# Supplementary material for: Cervical cancer screening uptake and correlates among HIV-infected women: a cross-sectional survey in Côte d’Ivoire, West Africa
Source: PubMed Central journal article supplement — BMJ Open. 2019 Aug 30;9(8):e029882. doi: 10.1136/bmjopen-2019-029882 (PMC6720463; doi:10.1136/bmjopen-2019-029882), 2019-08-30
Supplement: bmjopen-2019-029882.draft_revisions.pdf [file bmjopen-2019-029882.draft_revisions.pdf]

# BMJ Open

BMJ Open is committed to open peer review. As part of this commitment we make the peer review history of every article we publish publicly available.

When an article is published we post the peer reviewers' comments and the authors' responses online. We also post the versions of the paper that were used during peer review. These are the versions that the peer review comments apply to.

The versions of the paper that follow are the versions that were submitted during the peer review process. They are not the versions of record or the final published versions. They should not be cited or distributed as the published version of this manuscript.

BMJ Open is an open access journal and the full, final, typeset and author-corrected version of record of the manuscript is available on our site with no access controls, subscription charges or pay-per-view fees (<http://bmjopen.bmj.com>).

If you have any questions on BMJ Open's open peer review process please email [info.bmjopen@bmj.com](mailto:info.bmjopen@bmj.com)

# BMJ Open

## Cervical cancer screening Uptake and correlates among HIV-infected women on antiretroviral treatment: a cross-sectional survey in Côte d'Ivoire, West Africa

|                               |                                                                                                                                                                                                                                                                                                                                                                                                                                                                                                                                                                                                                                                                                                                                                                                                                                                                                                                                                                                                                                                                                                                                                                                                                       |
|-------------------------------|-----------------------------------------------------------------------------------------------------------------------------------------------------------------------------------------------------------------------------------------------------------------------------------------------------------------------------------------------------------------------------------------------------------------------------------------------------------------------------------------------------------------------------------------------------------------------------------------------------------------------------------------------------------------------------------------------------------------------------------------------------------------------------------------------------------------------------------------------------------------------------------------------------------------------------------------------------------------------------------------------------------------------------------------------------------------------------------------------------------------------------------------------------------------------------------------------------------------------|
| Journal:                      | <i>BMJ Open</i>                                                                                                                                                                                                                                                                                                                                                                                                                                                                                                                                                                                                                                                                                                                                                                                                                                                                                                                                                                                                                                                                                                                                                                                                       |
| Manuscript ID                 | bmjopen-2019-029882                                                                                                                                                                                                                                                                                                                                                                                                                                                                                                                                                                                                                                                                                                                                                                                                                                                                                                                                                                                                                                                                                                                                                                                                   |
| Article Type:                 | Research                                                                                                                                                                                                                                                                                                                                                                                                                                                                                                                                                                                                                                                                                                                                                                                                                                                                                                                                                                                                                                                                                                                                                                                                              |
| Date Submitted by the Author: | 18-Feb-2019                                                                                                                                                                                                                                                                                                                                                                                                                                                                                                                                                                                                                                                                                                                                                                                                                                                                                                                                                                                                                                                                                                                                                                                                           |
| Complete List of Authors:     | Tchounga, Boris; Programme PACCI, Site ANRS; Elizabeth Glaser Pediatric AIDS Foundation, Yaoundé, Cameroon<br>Boni, Simon Pierre; Programme PACCI, Site ANRS; Programme National de Lutte contre le Cancer, Research Abidjan , CI<br>Koffi, Jean Jacques ; Programme PACCI, Site ANRS<br>Horo, Apollinaire; Service de Gynécologie obstétrique, CHU de Yopougon, Abidjan, Côte d'Ivoire<br>Tanon , Aristophane ; Service des Maladies Infectieuses et Tropicales, CHU de Treichville, Abidjan, Côte d'Ivoire<br>Messou, Eugène; Centre de Prise en Charge de Recherche et de Formation CEPREF Abidjan, Côte d'Ivoire<br>Koulé, Serge-Olivier; Unité de soins ambulatoires et de conseils d'Abidjan, USAC Abidjan, Côte d'Ivoire<br>Adoubi, Innocent ; Service de cancérologie CHU de Treichville, Abidjan Côte d'Ivoire<br>Ekouevi, Didier; Université de Lomé, Département des Sciences Fondamentales et Santé Publique, Lomé, Togo; Centre Inserm 1219 & Institut de Santé Publique d'épidémiologie et de développement, Université de Bordeaux, Bordeaux, France<br>Jaquet, Antoine; Centre Inserm 1219 & Institut de Santé Publique d'épidémiologie et de développement, Université de Bordeaux, Bordeaux, France |
| Keywords:                     | Cervical cancer, screening uptake, HIV                                                                                                                                                                                                                                                                                                                                                                                                                                                                                                                                                                                                                                                                                                                                                                                                                                                                                                                                                                                                                                                                                                                                                                                |
|                               |                                                                                                                                                                                                                                                                                                                                                                                                                                                                                                                                                                                                                                                                                                                                                                                                                                                                                                                                                                                                                                                                                                                                                                                                                       |

SCHOLARONE™  
Manuscripts

1  
2  
3 **Cervical cancer screening Uptake and correlates among HIV-infected women on**  
4 **antiretroviral treatment: a cross-sectional survey in Côte d'Ivoire, West Africa**  
5  
6

7 Boris K. Tchounga<sup>1,2</sup>; Simon P. Boni<sup>1,3</sup>; Jean J. Koffi<sup>1</sup>, Appolinaire Horo<sup>4</sup>; Aristophane  
8 Tanon<sup>5</sup>; Eugène Messou<sup>6</sup>, Serge-Olivier Koulé<sup>7</sup>; Innocent Adoubi<sup>3,8</sup>; Didier  
9 Ekouevi<sup>1,9,10</sup>; Antoine Jaquet<sup>10</sup>, for the leDEA West Africa Collaboration.  
10  
11

- 12 1. Programme PACCI /site ANRS Abidjan, Abidjan, Cote d'Ivoire  
13  
14 2. Elizabeth Glaser Pediatric AIDS Foundation, Yaoundé, Cameroon  
15  
16 3. Programme National de Lutte contre le Cancer, Abidjan Côte d'Ivoire  
17  
18 4. Service de Gynécologie obstétrique, CHU de Yopougon, Abidjan, Côte d'Ivoire  
19  
20 5. Service des Maladies Infectieuses et Tropicales, CHU de Treichville, Abidjan, Côte d'Ivoire  
21  
22 6. Centre de Prise en Charge de Recherche et de Formation CEPREF Abidjan, Côte d'Ivoire  
23  
24 7. Unité de soins ambulatoires et de conseils d'Abidjan, USAC Abidjan, Côte d'Ivoire  
25  
26 8. Service de cancérologie CHU de Treichville, Abidjan Côte d'Ivoire  
27  
28 9. Université de Lomé, Département des Sciences Fondamentales et Santé Publique, Lomé,  
29 Togo  
30  
31  
32  
33 10. Centre Inserm 1219 & Institut de Santé Publique d'épidémiologie et de développement,  
34 Université de Bordeaux, Bordeaux, France  
35  
36  
37  
38  
39

40 **Corresponding Author:**

41 Boris Tchounga MD, PHD  
42 Programme PACCI /site ANRS Abidjan,  
43 Abidjan, Côte d'Ivoire  
44 Mail: boris.tchounga@yahoo.fr  
45  
46

47 Number of words: 2 628

48 Number of tables: 2

49 Number of figures: 1  
50  
51  
52  
53  
54  
55  
56  
57  
58  
59  
60

## ABSTRACT

**Objectives:** Despite the increasing number of interventions aiming to integrate cervical cancer (CC) screening into HIV clinics in sub-Saharan Africa, Women living with HIV (WLHIV) still have a high risk of developing cervical cancer. The aim of this study was to estimate the coverage of CC screening and associated factors among HIV infected women.

**Design:** Cross-sectional survey conducted from May to August 2017.

**Settings:** Outpatient setting in the four highest volume HIV clinics in Côte d'Ivoire.

**Participants:** All WLHIV, aged 25 to 55 years, followed up since at least one year, selected through a systematic sampling procedure.

**Intervention:** A standardized questionnaire administered to each participant by trained healthcare workers.

**Outcome:** Coverage of cervical cancer screening and factors associated with uptake of screening among WLHIV.

**Results:** A total of 1991 WLHIV were included in the study, aged in median 42 years [ (IQR): 38-47], and a median CD4 count (last known) of 560 [379-773] cells/mm<sup>3</sup>. Among the participants, 1913 (96.7%) had ever heard about CC, 1444 (72.5%) had been offered CC screening, mainly in the HIV clinic for 1244 (88.9%), and 1148 reported a personal history of CC screening for an overall coverage of 59.7% [CI 57.6 - 62.0]. In multivariable analysis, university level (aOR=2.1[1.4;3.1], p<0.001), being informed on CC at the HIV clinic (aOR=1.5 [1.1;2.0], p=0.017), receiving information (self-considered) clear and understood on CC (aOR=1.7[1.4;2.2], p<0.001), identifying HIV as a risk factor for CC (aOR=1.4[1.1;1.8], p=0.002) and proposition of CC screening in the HIV clinic (aOR=10.1 [7.6;13.5], p<0.001), were associated with uptake of CC screening.

**Conclusion:** Initiatives to support CC screening in HIV care programs resulted in effective access to more than half of the WLHIV on ART in Abidjan. Efforts are still needed to provide universal access to CC screening, especially among socio-economically disadvantaged WLHIV.

**Key words:** Cervical cancer; screening Uptake; HIV; ART

### Strengths and limitations of this study

- This study reports the cervical cancer coverage among women living with HIV in Côte d'Ivoire, a country with one of the highest HIV prevalence among women.
- The data were collected in almost 2000 participants selected through a daily systematic sampling procedure during a period of four months, allowing participation of patients on multi months ART dispensation.
- The reasons for not being screen are appropriately explored as well as the factors associated to cervical cancer screening uptake.
- The specificity of rural area is not clearly emphasized with this population although can be extrapolated.

## Introduction

Cervical cancer (CC) is the fourth most common cancer in women worldwide, with an estimated incidence of 570 000 new cases and approximately 311 000 new associated deaths in 2018 [1]. In sub Saharan Africa, CC account for 20.8% of all cancers in women and 14.2% of all cancer related death in women [2]. In Côte d'Ivoire, after breast cancer, CC is the second most common cancer among women accounting for 28.6% of all women's cancers and the leading cause of cancer deaths with 22.2% of all cancer related deaths [2].

The persistent infection with oncogenic Human Papilloma Viruses (HPV) is a necessary cofactor for CC, responsible for the development of precancerous lesions that lead to invasive CC if left untreated [3]. Infection with human immunodeficiency virus (HIV) is another cofactor identified to accelerate the occurrence of CC [4,5]. HIV is also associated with severe abnormalities such as extensive cervix lesions, three times more common in women living with HIV/AIDS (WLHIV) than in those with no history of HIV [6,7]. In addition, a two-fold increase in the risk of death was reported among HIV-infected women compared to their HIV-negative counterparts [8].

The long asymptomatic phase and slow disease progression from the persistent infection with oncogenic HPV to invasive carcinoma, characterizing the CC make it a highly preventable cancer through screening and HPV immunization [9]. Since 2012, a CC prevention strategy based on integration of visual inspection of the cervix with acetic acid (VIA) in reproductive health and family planning services was adopted in many African countries in order to increase access to CC screening services [10,11]. While CC screening uptake among women in developed settings is relatively high, overall more than 50% (79.4% in Brazil [12], 60% in United States [13], 89.1% in France [14]) mainly by Pap smears, data on access to CC screening in developing countries are still scarce. Recent studies conducted in Ethiopia and Uganda revealed a low CC screening uptake of 23.5% and 30.3%, respectively [15,16] and pointed out the role of sociodemographic factors and attitude of healthcare providers on the decision of beneficiaries to attend CC screening units [16,17].

In West and Central Africa region, Cote d'Ivoire is the fourth country with the highest HIV prevalence among women (4.1%) [19], and there is no data available on the coverage of CC screening among HIV positive women. This study aimed at estimating the uptake of CC screening and correlates among WLHIV in Abidjan, the economic capital of Côte d'Ivoire.

## Method

### Study design and setting

A cross-sectional survey was conducted from May to August 2017 among WLHIV followed in the four major HIV clinics in Abidjan, Côte d'Ivoire. During the study period, all women aged 25 to 55 years, followed up in the HIV clinic since at least one year, were eligible to participate.

### Sampling

Participants were selected through a systematic sampling procedure. For every woman presenting at the HIV clinic for a routine follow-up visit, eligibility criteria were checked at the entrance desk and a sequential number was given to each eligible participant according to the arrival order. The first eligible participant of the day was selected and a sampling interval of three was applied to select subsequent participants. This procedure was repeated every day in each participating HIV clinics and a sticker was pasted on medical record of participants to avoid multiple enrolments of same participant.

### Data collection

A standardized questionnaire was administered to each participant by previously trained nurses, midwives or social workers. This questionnaire allowed the collection of data on demographics (age, education, marital status, monthly income), knowledge of CC (existence of the disease, risk factors and prevention), personal history of CC screening (date, place, provider, screening method, number of screening done). Additional HIV data (date of HIV infection diagnosis, history of CD4 count measures, clinical stage at enrolment into HIV care and antiretroviral therapy use) were extracted from the electronic records of the respective HIV clinics.

### Outcomes and variables

The educational level was categorized in two modalities: "less educated" for women with no formal or primary or secondary level education and "more educated" for those with university education level. To perform the logistic regression, we use the dichotomic variable "ever had a CC screening" yes/no as dependent variable and the independent variables where demographic characteristics, HIV follow up characteristics and knowledge of cervical cancer.

### Statistical analysis

Qualitative variables were described as frequencies with percentages and quantitative variables were described as medians with interquartile range (IQR). Chi square test and Fisher exact test were used for the comparison of qualitative variables. For all the results,  $p < 0.05$  was

1  
2  
3 considered statistically significant. Logistic regression analysis using a step-wise backward  
4 procedure was performed to assess factors associated with uptake of cervical cancer  
5 screening among women living with HIV. Multivariable analysis was performed including all  
6 variables associated with uptake of cervical cancer screening with a significance level  $\leq 0.25$   
7 in univariate analysis. All Analysis were performed using STATA V12.0 (StataCorp, College  
8 Station, Texas).  
9  
10  
11  
12  
13

### 14 **Patient and public involvement**

15  
16  
17 Patients and public were not involved in the design of the study, but the questionnaire was  
18 submitted to a panel of Women living with HIV to identify unclear or confusing questions. They  
19 made some amendment and recommendation that were taken into account in the final version  
20 of the questionnaire.  
21  
22  
23  
24  
25

### 26 **Ethic statement**

27  
28 Ethical approval was obtained from the national ethic committee for research in health of Côte  
29 d'Ivoire, the country national IRB. Each participant was given comprehensive information on  
30 the protocol of the study and had to provide a written consent before being enrolled.  
31  
32  
33  
34  
35  
36  
37  
38  
39  
40  
41  
42  
43  
44  
45  
46  
47  
48  
49  
50  
51  
52  
53  
54  
55  
56  
57  
58  
59  
60



## RESULTS

### *Sociodemographic and HIV follow up characteristics*

Overall, 1,991 participants were interviewed with a median age of 42 years (Inter Quartile Range IQR [37-47]). Among them, 1,736 (87.2%) had no formal or primary level or secondary education, 1 055 (53.0%) were married or living with a partner, and 1 052 (52.8%) had no income or earned less than the national minimum wage (\$109). For HIV characteristics, 971 (48.8%) of participants were enrolled in the cohort with a WHO clinical stage I or II. The median CD4 count at enrolment in the cohorts was 287 cell/mm<sup>3</sup> (IQR [140-459]), and the last known median CD4 count was 563 cell/mm<sup>3</sup> (IQR [378-773]). The median follow-up duration was 8 years (IQR [4-11]). Most participants (94.9%) initiated antiretroviral treatment (ART) and the median duration on ART was 7 years (IQR [3-10]).

### *Knowledge on cervical cancer*

Among the participants 1,913 (96.7%) had previously heard about CC, and 1,451 (75.8%) heard about it in their follow up HIV clinic. The information received about CC was clear and understood for 1 167 (61.0%) participants. More educated women were more likely to receive a clear and understandable information about CC than those who were less educated (78.4% vs 58.3%;  $p < 0.001$ ). CC was known as a preventable disease by 1,450 (75.8%) participants, and screening and HPV vaccine were identified as preventive methods by 939 (90.4%) and 423 (29.7%) participants, respectively. More educated women were more likely to identify screening as preventive method than the less educated ones (75.2% vs 73.0% respectively,  $p = 0.001$ ). Regarding risk factors for CC, multiple sexual partner and early sexual initiation were identified by 1,238 (64.7%) and 1,113 (58.2%) participants, respectively. Only 814 (42.5%) participants identified HIV infection as a risk factor for CC, mainly more educated women (53.3% vs 40.9%;  $p < 0.001$ ) (Table 1).

**Table 1:** knowledge on cervical cancer and screening according to education level among women living with HIV in Côte d'Ivoire, West Africa

| Characteristics                                | Total<br>N =1 991<br>N (%) | Less educated<br>N =1 936<br>N (%) | University level<br>N= 255<br>N (%) | P<br>value |
|------------------------------------------------|----------------------------|------------------------------------|-------------------------------------|------------|
| <b>Ever Heard about CC</b>                     |                            |                                    |                                     |            |
| Yes                                            | 1,913 (96.7)               | 1,658 (96.2)                       | 255 (100.0)                         | 0.002      |
| <b>Heard about CC in Hospital* (N=1,913)</b>   |                            |                                    |                                     |            |
| In my follow up HIV clinic                     | 1,451 (75.8)               | 1,257 (75.8)                       | 194 (76.1)                          | 0.927      |
| <b>Heard about CC in the media* (N=1,913)</b>  |                            |                                    |                                     |            |
| Yes                                            | 1,236 (64.6)               | 1,029 (62.1)                       | 207 (81.2)                          | <0.001     |
| <b>The information received was* (N=1,913)</b> |                            |                                    |                                     |            |
| Not clear / I did not understand               | 746 (39.0)                 | 691 (41.7)                         | 55 (21.6)                           | <0.001     |
| Very Clear / I understand it                   | 1,167 (61.0)               | 967 (58.3)                         | 200 (78.4)                          |            |
| <b>CC is a preventable (N=1,913)</b>           |                            |                                    |                                     |            |
| Yes                                            | 1,450 (75.8)               | 1,240 (74.8)                       | 210 (82.4)                          | 0.009      |
| <b>Means of prevention for CC* (N=1,450)</b>   |                            |                                    |                                     |            |
| Screening                                      | 939 (90.4)                 | 781 (63.0)                         | 158 (75.2)                          | 0.001      |
| Vaccine                                        | 423 (29.7)                 | 332 (26.8)                         | 91 (43.3)                           | <0.001     |
| <b>Risk factors for CC* (N=1,913)</b>          |                            |                                    |                                     |            |
| HIV infection                                  | 814 (42.5)                 | 678 (40.9)                         | 136 (53.3)                          | <0.001     |
| Multiple sexual partners                       | 1,238 (64.7)               | 1,060 (63.9)                       | 178 (69.8)                          | 0.068      |
| Early sexual initiation                        | 1,113 (58.2)               | 943 (56.9)                         | 170 (66.7)                          | 0.004      |

CC: Cervical Cancer

### *Access to cervical cancer screening*

Among the 1,913 participants, 1,188 have ever been screened and the overall CC screening coverage among WLHIV was estimated to 59.7% [95%CI (57.6 - 62.0)]. Overall, 1,444 (72.5%) participants had ever been offered CC screening, most of them in their follow up HIV clinic (88.9%). The main screening methods were VIA for 1,050 (88.4%) participants and Pap smear for 120 (10.1%) participants. After CC screening, results were given to 1,146 (96.5%) women and only 778 (65.5%) of them declared having received advises for repeated screening over time. Half of screened participants (48.8%) declared having done the screening because it was advised by the healthcare workers, 328 (27.6%) declared that it was their personal decision and 188 (15.8%) declared having accept it because it was part of a research project in which they were involved. Among the 803 (40.3%) women with no history of CC screening, the lack of information about CC (54%), the fear of the result of CC screening (22%), Negligence (15%), and fear of induced cost (10%) were the main reasons (Figure 1).

### *Factors associated with cervical cancer screening uptake*

In univariable and multivariable analysis, almost the same variables were significantly associated with the uptake of CC screening at least once among WLHIV. In multivariate analysis, being aged  $\geq 45$  years old (aOR=1.4 [1.1;1.8],  $p=0.012$ ), having the university education level (aOR=2.1 [1.4;3.1],  $p<0.001$ ), being informed on CC in the follow up HIV clinic (aOR=1.5 [1.1;2.0],  $p=0.017$ ), having received information on CC self-considered as clear and understood (aOR=1.7 [1.4;2.2],  $p<0.001$ ), being followed up in the HIV clinic for at least ten years (aOR=1.4 [1.0 ; 1.8],  $p=0.043$ ), identifying HIV as a risk factor of CC (aOR=1.4 [1.1;1.8],  $p=0.002$ ) and having being proposed CC screening in the participant HIV follow up clinic (aOR=10.1 [7.6;13.5],  $p<0.001$ ), were associated with access to CC screening (Table 2).

**Table 2:** Factors associated with access to cervical cancer screening among women living with HIV in Côte d'Ivoire, West Africa

| Variables                           | n/N       | Uni variable model |         | Multivariable model (final) |         |
|-------------------------------------|-----------|--------------------|---------|-----------------------------|---------|
|                                     |           | aOR (CI 95%)       | p-value | aOR (CI 95%)                | p-value |
| <b>Age (years)</b>                  |           |                    |         |                             |         |
| <45                                 | 747/1293  | 1                  | -       | 1                           | -       |
| ≥45                                 | 441/698   | 1.3 (1.0 – 1.5)    | 0.019   | 1.4 (1.1 – 1.8)             | 0.012   |
| <b>Marital status</b>               |           |                    |         |                             |         |
| Living alone                        | 623/1083  | 1                  | -       | -                           | -       |
| living with a partner               | 565/908   | 1.2 (1.0 - 1.4)    | 0.033   | 1.3 (1.0 – 1.6)             | 0.046   |
| <b>Educational level</b>            |           |                    |         |                             |         |
| No formal / primary level           | 568/1057  | 1                  | -       | 1                           | -       |
| Secondary level                     | 430/679   | 1.5 (1.2 – 1.8)    | <0.001  | 1.2 (0.9 - 1.5)             | 0.211   |
| University                          | 190/255   | 2.5 (1.8 – 3.4)    | <0.001  | 2.1 (1.4 - 3.1)             | <0.001  |
| <b>Information on CC</b>            |           |                    |         |                             |         |
| Informed elsewhere                  | 135/535   | 1                  | -       | 1                           | -       |
| Informed in usual HIV clinic        | 1053/1456 | 7.7 (6.2 – 9.7)    | <0.001  | 1.5 (1.1 – 2.0)             | 0.017   |
| <b>Clarity of information</b>       |           |                    |         |                             |         |
| Not clear for me                    | 341/820   | 1                  | -       | 1                           | -       |
| Very clear for me                   | 847/1171  | 4.0 (3.0 – 4.4)    | <0.001  | 1.7 (1.4 – 2.2)             | <0.001  |
| <b>Proposition of screening</b>     |           |                    |         |                             |         |
| Proposed elsewhere                  | 147/700   | 1                  | -       | 1                           | -       |
| Proposed in usual HIV clinic        | 1041/1291 | 15.7 (12.5 – 19.7) | <0.001  | 10.1 (7.6 – 13.5)           | <0.001  |
| <b>Clinical Stage</b>               |           |                    |         |                             |         |
| III-IV/C                            | 254/519   | 1                  | -       | 1                           | -       |
| I-II/ A-B                           | 572/971   | 1.5 (1.2 – 1.9)    | <0.001  | 1.6 (1.2 – 2.0)             | 0.001   |
| Missing values                      | 362/501   | 2.7 (2.1 – 3.5)    | <0.001  | 1.8 (1.3 - 2.5)             | <0.001  |
| <b>Follow up duration</b>           |           |                    |         |                             |         |
| 1-4                                 | 231/512   | 1                  | -       | 1                           | -       |
| 5-9                                 | 431/720   | 1.8 (1.4- 2.3)     | <0.001  | 1.2 (0.9 – 1.7)             | 0.156   |
| ≥10                                 | 526/759   | 2.7 (2.1 – 3.4)    | <0.001  | 1.4 (1.0 – 1.8)             | 0.043   |
| <b>Knowing HIV as a risk factor</b> |           |                    |         |                             |         |
| No                                  | 631/1172  | 1                  | -       | 1                           | -       |
| Yes                                 | 557/819   | 1.8 (1.5 – 2.2)    | <0.001  | 1.4 (1.1 – 1.8)             | 0.002   |

## DISCUSSION

This study assesses the CC screening coverage among women living with HIV in Abidjan, aged 42 years old in median, with low education level and socioeconomic situation, and a clinically and immunologically stable HIV disease. Most of the women were aware of cervical cancer screening, and the information received was clear and understood by less than one third of them. The uptake of cervical cancer screening was around 60% and was associated with education level, clarity of information, offer of CC screening in the follow up HIV clinic and identification of HIV as a risk factor for CC. In addition, lack of information and fear of being diagnosed with CC were the main reasons for not being screened among women living with HIV.

This study reports that three over five women living with HIV in our study population had been screened for cervical cancer at least once during the last three years. This result is higher than previous reports from Nigeria, Ethiopia and Uganda, where the CC screening uptake rates were 9.5%, 23.5% and 30.3%, respectively [15,16,20]. This result support the successful integration of CC screening services in HIV clinics in Cote d'Ivoire. Indeed, since 2010, the national cancer control program and the national aids control program have been involved in the pilot phase of the cervical cancer prevention project (CECAP) supported by MOH and implementing partners. The aim was to integrate CC screening in HIV clinics and improve access to screening for women living with HIV, highly exposed to cervical cancer. From 2010 to 2015, almost all the HIV clinics in Abidjan and the hinterland were equipped for CC screening and their staffs trained to provide CC screening and treatment of eligible precancerous lesions free of charge [21]. The collaboration between AIDS and cancer control programs led to this successful integration of services that has been describe in other SSA countries as a game changer for the prevention of cervical cancer among HIV-infected women [22,23]. The positive effect of this service integration is emphasized in our study by the association between screening uptake and the offer of CC screening in the HIV clinic were the participant is usually followed. Indeed, half of the screened women declare having accept the screening because it was advised by the healthcare worker at the HIV clinic.

Despite the important coverage of CC screening reported in this study, around 40% of WLHIV have never been screened despite their high risk of developing an invasive cervical cancer, usually diagnosed at an advanced stage in SSA [24,25]. Lack of information was the main reason reported by HIV-positive women never screened for CC in Abidjan. This result suggests that despite efforts from the national cancer program to increase awareness of CC among

1  
2  
3 women (either in hospital-based strategy by training healthcare workers to offer CC screening  
4 or in community-based strategy through awareness campaign involving community  
5 mobilizers), messages to raise awareness on CC and its prevention remain poorly understood.  
6  
7

8  
9 When analyzing factors associated to CC screening uptakes, it appears that highly educated  
10 women and those who identified HIV as a risk factor for CC were more likely to attend CC  
11 screening. Thus, misunderstanding of information on CC remain an important barrier to  
12 screening among HIV-positive women as reported in other studies [26,27]. In addition, the  
13 important gap (36%) observed between the numbers of women who had been offered CC  
14 screening and those who have been effectively screened, reported in our population is  
15 consistent with previous study from Uganda [15]. This result underline the importance of a  
16 tailored communication strategy to take into account factors that influence the decision to  
17 undergo CC screening, such as low education level, and cultural beliefs reported in other SSA  
18 countries [26]. In addition to participants related barriers, providers related barriers such as  
19 lack of knowledge and failure to inform or encourage women to get screened were reported in  
20 other SSA countries, and could also play an important role in Côte d'Ivoire, although not  
21 specifically explored in this study [28].  
22  
23  
24  
25  
26  
27  
28  
29  
30

31  
32 The WHO guideline for prevention and care of CC among women recommend for low- and  
33 middle-income countries to perform VIA screening for all HIV-positive women between 30-49  
34 years old or older for those with visible transformation zone and to repeat the screening Test  
35 within three years. They also have to attend screening unit one year after treatment for a  
36 control [29]. To improve the uptake of CC screening, it is critical to improve health education  
37 and awareness among WLHIV, by reshaping the hospital-based communication approach for  
38 CC. A recent systematic review on strategies implemented in SSA to improve CC screening  
39 reported that about three fourth of these strategies include education and awareness activities,  
40 but most of them failed to demonstrate the effectiveness of the strategy [30]. Most of these  
41 interventions had anticipated solution for financial barriers for clients, materials supply and  
42 capacity building of staff, while the main problem is to improve beneficiaries understanding of  
43 CC prevention messages. Usually, the level of communication on CC prevention services is  
44 standardized and not adapted to all the social categories. A specific educational program which  
45 use culturally sensitive and linguistically appropriate strategies to deliver tailoring CC  
46 prevention messages could enhance awareness of PLHIV and increase CC screening rates.  
47 Furthermore, a collaboration between CC screening providers and community health  
48 educators is critical to improve the understanding of health education message as already  
49 reported in SSA [31].  
50  
51  
52  
53  
54  
55  
56  
57  
58  
59  
60

1  
2  
3 This study was conducted among women living with HIV and followed up in HIV clinics of  
4 Abidjan, an urban area. These results may thus mostly reflect the feature in urban settings  
5 where people are more educated and more exposed to cervical cancer awareness activities  
6 than in rural settings. In addition, this study was conducted in the largest and oldest HIV clinics  
7 in Abidjan, where cervical cancer screening is provided free of charge since the initiation of  
8 CECAP in 2010. However, the survey was conducted in the four largest (high volume) HIV  
9 clinics in the country, using a daily-repeated systematic random selection procedure over a  
10 period of three months. This makes it possible to consider the variability of the population  
11 attending these HIV clinics and help mitigate the risk of selection bias.  
12  
13  
14  
15  
16  
17  
18  
19

## 20 CONCLUSION

21  
22 Initiatives to support CC screening in HIV care programs have resulted in effective access to  
23 more than half of the WLHIV on ART follow up in Abidjan. Nevertheless, efforts are still needed  
24 to provide universal access to CC screening, which remains a cancer defining AIDS that is  
25 poorly prevented by antiretroviral treatments. Promoting CC screening among socio-  
26 economically disadvantaged WLHIV by addressing client barriers still need to be prioritized.  
27  
28  
29  
30  
31  
32  
33  
34  
35  
36

### 37 Figure legend caption

38 **Figure 1:** Reasons for not being screened for cervical cancer among women living with HIV  
39 in Côte d'Ivoire, West Africa  
40  
41  
42  
43  
44  
45  
46  
47  
48  
49  
50  
51  
52  
53  
54  
55  
56  
57  
58  
59  
60

### **ACKNOWLEDGEMENTS**

We would like to warmly thank Pr François Dabis for his advises and orientation when designing and implementing the study, as well as Mr Azany Jean Claude for his strong support in data management and study monitoring.

### **Funding:**

The study was conducted under the leDEA West Africa collaboration grants funded by the National Cancer Institute (NCI); Eunice Kennedy Shriver National Institute of Child Health & Human Development (NICHD); National Institute of Allergy and Infectious Diseases (NIAID); Grant number: 5U01AI069919.

### **Competing interest**

The authors have no conflict of interest to declare.

### **Authors Contribution**

BT and AJ designed the study. BT, SB, JJK, DKE, AH, AT, EM, IA and AJ supervised the study implementation and data collection. Statistical analysis was performed by BT, SB and AJ. Data interpretation and first draft of manuscript was done by BT, SB, JJK and AJ. Critical revision of the manuscript for important intellectual content was provided by all the coauthors who read and commented on the original manuscript and all agreed on the version finalized by BT, SB and AJ for submission.

### **Data availability statement**

No additional data available



## REFERENCES

1. Bray F, Ferlay J, Soerjomataram I, Siegel RL, Torre LA, Jemal A. Global cancer statistics 2018: GLOBOCAN estimates of incidence and mortality worldwide for 36 cancers in 185 countries. *CA Cancer J Clin*. 1 nov 2018;68(6):394-424.
2. International Agency for Research on Cancer. Estimated number of incidence and deaths in 2018, WHO Africa region (AFRO), females, all ages [Internet]. IARC, WHO Cancer Today. 2018 [cité 14 janv 2019]. Disponible sur: <http://gco.iarc.fr/today/home>
3. Xi LF, Demers GW, Koutsky LA, Kiviat NB, Kuypers J, Watts DH, et al. Analysis of Human Papillomavirus Type 16 Variants Indicates Establishment of Persistent Infection. *J Infect Dis*. 1 sept 1995;172(3):747-55.
4. Clifford G, Franceschi S, Diaz M, Muñoz N, Villa LL. Chapter 3: HPV type-distribution in women with and without cervical neoplastic diseases. *Vaccine*. 21 août 2006;24:S26-34.
5. Bonnet F, Lewden C, May T, Heripret L, Jouglu E, Bevilacqua S, et al. Malignancy-related causes of death in human immunodeficiency virus-infected patients in the era of highly active antiretroviral therapy. *Cancer*. 15 juill 2004;101(2):317-24.
6. Massad LS, Ahdieh L, Benning L, Minkoff H, Greenblatt RM, Watts H, et al. Evolution of cervical abnormalities among women with HIV-1: evidence from surveillance cytology in the women's interagency HIV study. *J Acquir Immune Defic Syndr* 1999. 15 août 2001;27(5):432-42.
7. Horo A, Jaquet A, Ekouevi DK, Toure B, Coffie PA, Effi B, et al. Cervical cancer screening by visual inspection in Côte d'Ivoire, operational and clinical aspects according to HIV status. *BMC Public Health*. 23 mars 2012;12:237.
8. Dryden-Peterson S, Bvochora-Nsingo M, Suneja G, Efstathiou JA, Grover S, Chiyapo S, et al. HIV Infection and Survival Among Women With Cervical Cancer. *J Clin Oncol Off J Am Soc Clin Oncol*. 1 nov 2016;34(31):3749-57.
9. World Health Organization. WHO Comprehensive cervical cancer control: a guide to essential practice – 2nd ed. [Internet]. Geneva, Switzerland: WHO; 2014 [cité 15 sept 2017] p. 408. Disponible sur: <http://www.who.int/reproductivehealth/publications/cancers/cervical-cancer-guide/en/>
10. Belhadj H, Rasanathan JJK, Denny L, Broutet N. Sexual and reproductive health and HIV services: integrating HIV/AIDS and cervical cancer prevention and control. *Int J Gynaecol Obstet Off Organ Int Fed Gynaecol Obstet*. mai 2013;121 Suppl 1:S29-34.
11. Tchounga BK, Jaquet A, Coffie PA, Horo A, Sauvaget C, Adoubi I, et al. Cervical cancer prevention in reproductive health services: knowledge, attitudes and

- 1  
2  
3 practices of midwives in Côte d'Ivoire, West Africa. *BMC Health Serv Res.* 11  
4 avr 2014;14:165.  
5
- 6  
7 12. Barbosa IR. Regional and Socioeconomic Differences in the Coverage of the  
8 Papanicolaou Test in Brazil: Data from the Brazilian Health Survey 2013. *Rev*  
9 *Bras Ginecol E Obstet Rev Fed Bras Soc Ginecol E Obstet.* sept  
10 2017;39(9):480-7.  
11
- 12 13. Swan J, Breen N, Coates RJ, Rimer BK, Lee NC. Progress in cancer screening  
13 practices in the United States: results from the 2000 National Health Interview  
14 Survey. *Cancer.* 15 mars 2003;97(6):1528-40.  
15
- 16 14. Oussaid N, Lutringer-Magnin D, Barone G, Haesebaert J, Lasset C. Factors  
17 associated with Pap smear screening among French women visiting a general  
18 practitioner in the Rhône-Alpes region. *Rev Epidemiol Sante Publique.* oct  
19 2013;61(5):437-45.  
20
- 21 15. Wanyenze RK, Bwanika JB, Beyeza-Kashesya J, Mugerwa S, Arinaitwe J,  
22 Matovu JKB, et al. Uptake and correlates of cervical cancer screening among  
23 HIV-infected women attending HIV care in Uganda. *Glob Health Action.*  
24 2017;10(1):1380361.  
25
- 26 16. Erku DA, Netere AK, Mersha AG, Abebe SA, Mekuria AB, Belachew SA.  
27 Comprehensive knowledge and uptake of cervical cancer screening is low  
28 among women living with HIV/AIDS in Northwest Ethiopia. *Gynecol Oncol Res*  
29 *Pract.* 2017;4:20.  
30
- 31 17. Ebu NI. Socio-demographic characteristics influencing cervical cancer screening  
32 intention of HIV-positive women in the central region of Ghana. *Gynecol Oncol*  
33 *Res Pract.* 2018;5:3.  
34
- 35 18. Osingada CP, Ninsiima G, Chalo RN, Muliira JK, Ngabirano T. Determinants of  
36 Uptake of Cervical Cancer Screening Services at a No-cost Reproductive Health  
37 Clinic Managed by Nurse-Midwives. *Cancer Nurs.* juin 2015;38(3):177-84.  
38
- 39 19. Évaluation de l'impact du VIH dans la population générale en CÔTE D'IVOIRE,  
40 CIPHIA 2017-2018 [Internet]. [cité 4 févr 2019]. Disponible sur:  
41 [https://phia.icap.columbia.edu/wp-content/uploads/2018/09/3474CIPHIA\\_Cote-](https://phia.icap.columbia.edu/wp-content/uploads/2018/09/3474CIPHIA_Cote-D27Ivoire-SS_FRENCH.v6.FINAL_.pdf)  
42 [D27Ivoire-SS\\_FRENCH.v6.FINAL\\_.pdf](https://phia.icap.columbia.edu/wp-content/uploads/2018/09/3474CIPHIA_Cote-D27Ivoire-SS_FRENCH.v6.FINAL_.pdf)  
43  
44  
45  
46  
47
- 48 20. Ezechi OC, Gab-Okafor CV, Ostergren PO, Odberg Pettersson K. Willingness  
49 and acceptability of cervical cancer screening among HIV positive Nigerian  
50 women. *BMC Public Health.* 17 janv 2013;13:46.  
51
- 52 21. National Cancer Control Program. National guidelines for the cervical cancer  
53 prevention, Cote d'Ivoire. National Cancer Control Program (NCCP), Cote  
54 d'Ivoire; 2013.  
55
- 56 22. Franceschi S, Jaffe H. Cervical cancer screening of women living with HIV  
57 infection: a must in the era of antiretroviral therapy. *Clin Infect Dis Off Publ Infect*  
58 *Dis Soc Am.* 15 août 2007;45(4):510-3.  
59  
60

- 1
- 2
- 3 23. Odafe S, Torpey K, Khamofu H, Oladele E, Adedokun O, Chabikuli O, et al.
- 4 Integrating cervical cancer screening with HIV care in a district hospital in Abuja,
- 5 Nigeria. *Niger Med J J Niger Med Assoc.* 2013;54(3):176-84.
- 6
- 7 24. Dunyo P, Effah K, Udofia EA. Factors associated with late presentation of
- 8 cervical cancer cases at a district hospital: a retrospective study. *BMC Public*
- 9 *Health.* 3 oct 2018;18(1):1156.
- 10
- 11 25. Menon MP, Coghill A, Mutyaba IO, Phipps WT, Okuku FM, Harlan JM, et al.
- 12 Association Between HIV Infection and Cancer Stage at Presentation at the
- 13 Uganda Cancer Institute. *J Glob Oncol.* sept 2018;(4):1-9.
- 14
- 15 26. Bukirwa A, Mutyoba JN, Mukasa BN, Karamagi Y, Odiit M, Kawuma E, et al.
- 16 Motivations and barriers to cervical cancer screening among HIV infected
- 17 women in HIV care: a qualitative study. *BMC Womens Health.* 12 oct
- 18 2015;15:82.
- 19
- 20 27. Williams M, Kuffour G, Ekuadzi E, Yeboah M, EIDuah M, Tuffour P. Assessment
- 21 of psychological barriers to cervical cancer screening among women in Kumasi,
- 22 Ghana using a mixed methods approach. *Afr Health Sci.* déc
- 23 2013;13(4):1054-61.
- 24
- 25 28. McFarland DM, Gueldner SM, Mogobe KD. Integrated Review of Barriers to
- 26 Cervical Cancer Screening in Sub-Saharan Africa. *J Nurs Scholarsh Off Publ*
- 27 *Sigma Theta Tau Int Honor Soc Nurs.* 2016;48(5):490-8.
- 28
- 29 29. World Health Organization, éditeur. WHO guidelines for screening and treatment
- 30 of precancerous lesions for cervical cancer prevention. Geneva: World Health
- 31 Organization; 2013. 40 p.
- 32
- 33 30. Johnson LG, Armstrong A, Joyce CM, Teitelman AM, Buttenheim AM.
- 34 Implementation strategies to improve cervical cancer prevention in sub-Saharan
- 35 Africa: a systematic review. *Implement Sci IS.* 09 2018;13(1):28.
- 36
- 37 31. Uy C, Lopez J, Trinh-Shevrin C, Kwon SC, Sherman SE, Liang PS. Text
- 38 Messaging Interventions on Cancer Screening Rates: A Systematic Review. *J*
- 39 *Med Internet Res.* 24 août 2017;19(8):e296.
- 40
- 41
- 42
- 43
- 44
- 45
- 46
- 47
- 48
- 49
- 50
- 51
- 52
- 53
- 54
- 55
- 56
- 57
- 58
- 59
- 60

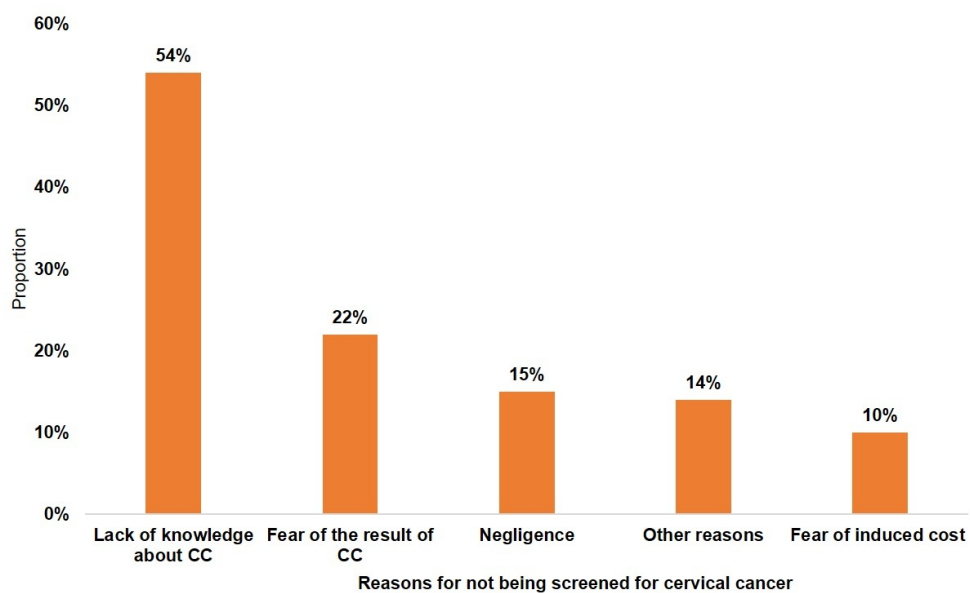

Figure 1: Reasons for not being screened for cervical cancer among women living with HIV in Côte d'Ivoire, West Africa

207x125mm (150 x 150 DPI)

STROBE Statement—Checklist of items that should be included in reports of *cross-sectional studies*

|                           | Item No | Recommendation                                                                                                                                                                                               | Page No |
|---------------------------|---------|--------------------------------------------------------------------------------------------------------------------------------------------------------------------------------------------------------------|---------|
| <b>Title and abstract</b> | 1       | (a) Indicate the study's design with a commonly used term in the title or the abstract                                                                                                                       | 1       |
|                           |         | (b) Provide in the abstract an informative and balanced summary of what was done and what was found                                                                                                          | 2       |
| <b>Introduction</b>       |         |                                                                                                                                                                                                              |         |
| Background/rationale      | 2       | Explain the scientific background and rationale for the investigation being reported                                                                                                                         | 3       |
| Objectives                | 3       | State specific objectives, including any prespecified hypotheses                                                                                                                                             | 3       |
| <b>Methods</b>            |         |                                                                                                                                                                                                              |         |
| Study design              | 4       | Present key elements of study design early in the paper                                                                                                                                                      | 4       |
| Setting                   | 5       | Describe the setting, locations, and relevant dates, including periods of recruitment, exposure, follow-up, and data collection                                                                              | 4       |
| Participants              | 6       | (a) Give the eligibility criteria, and the sources and methods of selection of participants                                                                                                                  | 4       |
| Variables                 | 7       | Clearly define all outcomes, exposures, predictors, potential confounders, and effect modifiers. Give diagnostic criteria, if applicable                                                                     | 4       |
| Data sources/measurement  | 8*      | For each variable of interest, give sources of data and details of methods of assessment (measurement). Describe comparability of assessment methods if there is more than one group                         | 4       |
| Bias                      | 9       | Describe any efforts to address potential sources of bias                                                                                                                                                    | 4       |
| Study size                | 10      | Explain how the study size was arrived at                                                                                                                                                                    | 4       |
| Quantitative variables    | 11      | Explain how quantitative variables were handled in the analyses. If applicable, describe which groupings were chosen and why                                                                                 | 4       |
| Statistical methods       | 12      | (a) Describe all statistical methods, including those used to control for confounding                                                                                                                        | 4       |
|                           |         | (b) Describe any methods used to examine subgroups and interactions                                                                                                                                          | 4       |
|                           |         | (c) Explain how missing data were addressed                                                                                                                                                                  | 4       |
|                           |         | (d) If applicable, describe analytical methods taking account of sampling strategy                                                                                                                           |         |
|                           |         | (e) Describe any sensitivity analyses                                                                                                                                                                        |         |
| <b>Results</b>            |         |                                                                                                                                                                                                              |         |
| Participants              | 13*     | (a) Report numbers of individuals at each stage of study—eg numbers potentially eligible, examined for eligibility, confirmed eligible, included in the study, completing follow-up, and analysed            | 6       |
|                           |         | (b) Give reasons for non-participation at each stage                                                                                                                                                         |         |
|                           |         | (c) Consider use of a flow diagram                                                                                                                                                                           |         |
| Descriptive data          | 14*     | (a) Give characteristics of study participants (eg demographic, clinical, social) and information on exposures and potential confounders                                                                     | 6       |
|                           |         | (b) Indicate number of participants with missing data for each variable of interest                                                                                                                          |         |
| Outcome data              | 15*     | Report numbers of outcome events or summary measures                                                                                                                                                         | 6       |
| Main results              | 16      | (a) Give unadjusted estimates and, if applicable, confounder-adjusted estimates and their precision (eg, 95% confidence interval). Make clear which confounders were adjusted for and why they were included | 6       |

|                          |    |                                                                                                                                                                            |    |
|--------------------------|----|----------------------------------------------------------------------------------------------------------------------------------------------------------------------------|----|
|                          |    | (b) Report category boundaries when continuous variables were categorized                                                                                                  | 6  |
|                          |    | (c) If relevant, consider translating estimates of relative risk into absolute risk for a meaningful time period                                                           | 6  |
| Other analyses           | 17 | Report other analyses done—eg analyses of subgroups and interactions, and sensitivity analyses                                                                             | 7  |
| <b>Discussion</b>        |    |                                                                                                                                                                            |    |
| Key results              | 18 | Summarise key results with reference to study objectives                                                                                                                   | 8  |
| Limitations              | 19 | Discuss limitations of the study, taking into account sources of potential bias or imprecision. Discuss both direction and magnitude of any potential bias                 | 9  |
| Interpretation           | 20 | Give a cautious overall interpretation of results considering objectives, limitations, multiplicity of analyses, results from similar studies, and other relevant evidence | 8  |
| Generalisability         | 21 | Discuss the generalisability (external validity) of the study results                                                                                                      | 10 |
| <b>Other information</b> |    |                                                                                                                                                                            |    |
| Funding                  | 22 | Give the source of funding and the role of the funders for the present study and, if applicable, for the original study on which the present article is based              | 11 |

\*Give information separately for exposed and unexposed groups.

**Note:** An Explanation and Elaboration article discusses each checklist item and gives methodological background and published examples of transparent reporting. The STROBE checklist is best used in conjunction with this article (freely available on the Web sites of PLoS Medicine at <http://www.plosmedicine.org/>, Annals of Internal Medicine at <http://www.annals.org/>, and Epidemiology at <http://www.epidem.com/>). Information on the STROBE Initiative is available at [www.strobe-statement.org](http://www.strobe-statement.org).

# BMJ Open

## Cervical cancer screening Uptake and correlates among HIV-infected women: a cross-sectional survey in Côte d'Ivoire, West Africa

|                                 |                                                                                                                                                                                                                                                                                                                                                                                                                                                                                                                                                                                                                                                                                                                                                                                                                                                                                                                                                                                                                                                                                                                                                                                                                     |
|---------------------------------|---------------------------------------------------------------------------------------------------------------------------------------------------------------------------------------------------------------------------------------------------------------------------------------------------------------------------------------------------------------------------------------------------------------------------------------------------------------------------------------------------------------------------------------------------------------------------------------------------------------------------------------------------------------------------------------------------------------------------------------------------------------------------------------------------------------------------------------------------------------------------------------------------------------------------------------------------------------------------------------------------------------------------------------------------------------------------------------------------------------------------------------------------------------------------------------------------------------------|
| Journal:                        | <i>BMJ Open</i>                                                                                                                                                                                                                                                                                                                                                                                                                                                                                                                                                                                                                                                                                                                                                                                                                                                                                                                                                                                                                                                                                                                                                                                                     |
| Manuscript ID                   | bmjopen-2019-029882.R1                                                                                                                                                                                                                                                                                                                                                                                                                                                                                                                                                                                                                                                                                                                                                                                                                                                                                                                                                                                                                                                                                                                                                                                              |
| Article Type:                   | Research                                                                                                                                                                                                                                                                                                                                                                                                                                                                                                                                                                                                                                                                                                                                                                                                                                                                                                                                                                                                                                                                                                                                                                                                            |
| Date Submitted by the Author:   | 04-Jun-2019                                                                                                                                                                                                                                                                                                                                                                                                                                                                                                                                                                                                                                                                                                                                                                                                                                                                                                                                                                                                                                                                                                                                                                                                         |
| Complete List of Authors:       | Tchounga, Boris; Programme PACCI, Site ANRS; Elizabeth Glaser Pediatric AIDS Foundation, Yaoundé, Cameroon<br>Boni, Simon Pierre; Programme PACCI, Site ANRS; Programme National de Lutte contre le Cancer, Research Abidjan, CI<br>Koffi, Jean Jacques ; Programme PACCI, Site ANRS<br>Horo, Apollinaire; Service de Gynécologie obstétrique, CHU de Yopougon, Abidjan, Côte d'Ivoire<br>Tanon, Aristophane ; Service des Maladies Infectieuses et Tropicales, CHU de Treichville, Abidjan, Côte d'Ivoire<br>Messou, Eugène; Centre de Prise en Charge de Recherche et de Formation CEPREF Abidjan, Côte d'Ivoire<br>Koulé, Serge-Olivier; Unité de soins ambulatoires et de conseils d'Abidjan, USAC Abidjan, Côte d'Ivoire<br>Adoubi, Innocent ; Service de cancérologie CHU de Treichville, Abidjan Côte d'Ivoire<br>Ekouevi, Didier; Université de Lomé, Département des Sciences Fondamentales et Santé Publique, Lomé, Togo; Centre Inserm 1219 & Institut de Santé Publique d'épidémiologie et de développement, Université de Bordeaux, Bordeaux, France<br>Jaquet, Antoine; Centre Inserm 1219 & Institut de Santé Publique d'épidémiologie et de développement, Université de Bordeaux, Bordeaux, France |
| <b>Primary Subject Heading</b>: | Public health                                                                                                                                                                                                                                                                                                                                                                                                                                                                                                                                                                                                                                                                                                                                                                                                                                                                                                                                                                                                                                                                                                                                                                                                       |
| Secondary Subject Heading:      | Epidemiology, HIV/AIDS, Oncology                                                                                                                                                                                                                                                                                                                                                                                                                                                                                                                                                                                                                                                                                                                                                                                                                                                                                                                                                                                                                                                                                                                                                                                    |
| Keywords:                       | Cervical cancer, screening uptake, HIV                                                                                                                                                                                                                                                                                                                                                                                                                                                                                                                                                                                                                                                                                                                                                                                                                                                                                                                                                                                                                                                                                                                                                                              |
|                                 |                                                                                                                                                                                                                                                                                                                                                                                                                                                                                                                                                                                                                                                                                                                                                                                                                                                                                                                                                                                                                                                                                                                                                                                                                     |

SCHOLARONE™  
Manuscripts

1  
2  
3 **Cervical cancer screening Uptake and correlates among HIV-infected women: a**  
4 **cross-sectional survey in Côte d'Ivoire, West Africa**  
5  
6

7 Boris K. Tchounga<sup>1,2</sup>; Simon P. Boni<sup>1,3</sup>; Jean J. Koffi<sup>1</sup>; Apollinaire G. Horo<sup>4</sup>;  
8 Aristophane Tanon<sup>5</sup>; Eugène Messou<sup>6</sup>; Serge-Olivier Koulé<sup>7</sup>; Innocent Adoubi<sup>3,8</sup>;  
9 Didier K. Ekouevi<sup>1,9,10</sup>; Antoine Jaquet<sup>10</sup>; for the leDEA West Africa Collaboration.  
10  
11

- 12  
13 1. Programme PACCI /site ANRS Abidjan, Abidjan, Cote d'Ivoire  
14  
15 2. Elizabeth Glaser Pediatric AIDS Foundation, Yaoundé, Cameroon  
16  
17 3. Programme National de Lutte contre le Cancer, Abidjan Côte d'Ivoire  
18  
19 4. Service de Gynécologie Obstétrique, CHU de Yopougon, Abidjan, Côte d'Ivoire  
20  
21 5. Service des Maladies Infectieuses et Tropicales, CHU de Treichville, Abidjan, Côte d'Ivoire  
22  
23 6. Centre de Prise en Charge de Recherche et de Formation CEPREF Abidjan, Côte d'Ivoire  
24  
25 7. Unité de soins ambulatoires et de conseils d'Abidjan, USAC Abidjan, Côte d'Ivoire  
26  
27 8. Service de cancérologie CHU de Treichville, Abidjan Côte d'Ivoire  
28  
29 9. Université de Lomé, Département des Sciences Fondamentales et Santé Publique, Lomé,  
30 Togo  
31  
32  
33 10. Centre Inserm 1219 & Institut de Santé Publique d'épidémiologie et de développement,  
34 Université de Bordeaux, Bordeaux, France  
35  
36  
37  
38  
39

40 **Corresponding Author:**

41 Boris Tchounga MD, PHD  
42 Programme PACCI /site ANRS Abidjan,  
43 Abidjan, Côte d'Ivoire  
44 Mail: boris.tchounga@yahoo.fr  
45  
46

47 Number of words: 3 392

48 Number of tables: 2

49 Number of figures: 1  
50  
51  
52  
53  
54  
55  
56  
57  
58  
59  
60



## ABSTRACT

**Objectives:** Despite the increasing number of interventions aiming to integrate cervical cancer screening into HIV clinics in sub-Saharan Africa, Women living with HIV (WLHIV) still have a high risk of developing cervical cancer. The aim of this study was to estimate the coverage of CC screening and associated factors among WLHIV in Abidjan, Côte d'Ivoire.

**Design:** Cross-sectional survey conducted from May to August 2017.

**Settings:** Outpatient setting in the four highest volume urban HIV clinics of government's or NGO's sector in Côte d'Ivoire.

**Participants:** All WLHIV, aged 25 to 55 years, followed since at least one year, selected through a systematic sampling procedure.

**Intervention:** A standardized questionnaire administered to each participant by trained healthcare workers.

**Outcome:** Cervical cancer screening uptake

**Results:** A total of 1,991 WLHIV were included in the study, aged in median 42 years [(IQR): 38-47], and a median CD4 count (last known) of 560 [379-773] cells/mm<sup>3</sup>. Among the participants, 1,913 (96.7%) had ever heard about cervical cancer, 1,444 (72.5%) had been offered cervical cancer screening, mainly in the HIV clinic for 1,244 (88.9%), and 1148 reported a personal history of cervical cancer screening for an overall coverage of 59.7% [CI 57.6 - 62.0]. In multivariable analysis, university level (aOR=2.1 [1.4;3.1], p<0.001), being informed on cervical cancer at the HIV clinic (aOR=1.5 [1.1;2.0], p=0.017), receiving information self-perceived as "clear and understood" on cervical cancer (aOR=1.7[1.4;2.2], p<0.001), identifying HIV as a risk factor for cervical cancer (aOR=1.4[1.1;1.8], p=0.002) and being proposed cervical cancer screening in the HIV clinic (aOR=10.1 [7.6;13.5], p<0.001), were associated with cervical cancer screening uptake.

**Conclusion:** Initiatives to support cervical cancer screening in HIV care programs resulted in effective access to more than half of the WLHIV in Abidjan. Efforts are still needed to provide universal access to cervical cancer screening, especially among socio-economically disadvantaged WLHIV.

**Key words:** Cervical cancer; screening Uptake; HIV; ART

### Strengths and limitations of this study

- This study reports the cervical cancer screening coverage among women living with HIV in Côte d'Ivoire, a country with one of the highest HIV prevalence among women.
- The methodological approach used in this study allowed the enrolment of a quite representative sample of WLHIV visiting the participating HIV clinics.
- Reasons for not being screened and factors associated with cervical cancer screening uptake were explored through face-to-face interviews.
- The specificity of rural area was not directly explored with this population.
- The data collected are declarative information, collected through face-to-face interviews with possible memory and social desirability bias.

## Introduction

Cervical cancer is the fourth most common cancer in women worldwide, with an estimated incidence of 570 000 new cases and approximately 311 000 new associated deaths in 2018 [1]. In sub Saharan Africa, cervical cancer account for 20.8% of all cancers in women and 14.2% of all cancer related deaths in women [2].

Persistent infection with oncogenic Human Papilloma Viruses (HPV) is a necessary cofactor for cervical cancer, responsible for the development of precancerous lesions that lead to invasive cervical cancer, if left untreated [3]. Infection with human immunodeficiency virus (HIV) is known to accelerates the development of precancerous lesions leading to a higher risk of cervical cancer [4,5]. Infection with HIV is also associated with more extensive lesions of the cervix, three to five times more common in women living with HIV/AIDS (WLHIV) than in those with no history of HIV [6–8]. In addition, a two-fold increase in the risk of death due to cervical cancer was reported in WLHIV compared to their HIV-negative counterparts [9].

The long asymptomatic phase and slow disease progression from the persistent infection with oncogenic HPV to invasive carcinoma, make cervical cancer a highly preventable cancer through screening and HPV immunization [10]. Since 2012, a cervical cancer prevention strategy based on integration of visual inspection of the cervix with acetic acid (VIA) in reproductive health and family planning services has been adopted in many African countries in order to increase access to cervical cancer screening services [11–13]. Cervical cancer screening uptake among women in developed settings is relatively high, 79.4% in Brazil [14], 60% in United States [15], and 89.1% in France [16], mainly with Pap smears. In developing countries, recent studies conducted in Ethiopia and Uganda revealed a low cervical cancer screening uptake of 23.5% and 30.3%, respectively [17,18] and emphasized the importance of sociodemographic factors and attitude of healthcare providers on the decision of beneficiaries to attend cervical cancer screening units [18,19].

In West Africa, Cote d'Ivoire has the highest HIV prevalence among women (4.1%) [20]. Cervical cancer is the second most common cancer among women accounting for 28.6% of all women's cancers and the leading cause of cancer deaths with 22.2% of all cancer related deaths [2]. The national guidelines on cervical cancer screening in the country are aligned with WHO guidelines for low- and middle-income countries, and recommend the screen-and-treat approach based preferentially on visual inspection with acetic acid or pap smear and cryotherapy or electrocoagulation, respectively. This recommendation targets women between 25 and 55 years old in the general population, and those diagnosed with HIV who should be systematically offered a screening per year once linked to HIV care [21]. These guidelines

1  
2  
3 relied on the screening program that was piloted in HIV clinics from 2008 to 2012 before being  
4 scaled up in all the government health facilities and at national level. However, data on the  
5 national coverage of cervical cancer screening among women in Côte d'Ivoire are currently  
6 not available. The only data available on the coverage of cervical cancer screening among  
7 WLHIV is the 10% UNAIDS estimates based on the data from 2011-12 Demographic and  
8 Health Survey [22]. The aim of this study was to estimate the uptake of cervical cancer  
9 screening and its correlates among WLHIV in Abidjan, the economic capital of Côte d'Ivoire.  
10  
11  
12  
13  
14  
15  
16  
17

## 18 **METHOD**

### 19 **Study design and setting**

20  
21  
22 A cross-sectional survey was conducted from May to August 2017 among WLHIV followed in  
23 the four HIV clinics with the highest number of persons actively followed in Abidjan, Côte  
24 d'Ivoire. During the study period, all women aged 25 to 55 years, followed in these HIV clinics  
25 since at least one year, were eligible to participate.  
26  
27  
28

### 29 **Sampling**

30  
31 Participants were selected through a systematic sampling procedure. For every woman  
32 presenting at the HIV clinic for a routine follow-up visit, eligibility criteria were checked at the  
33 entrance desk and a sequential number was given to each eligible participant according to the  
34 arrival order. The first eligible participant of the day was selected and a sampling interval of  
35 three was applied to select subsequent participants. This procedure was repeated every day  
36 in each participating HIV clinics and a sticker was pasted on medical record of participants to  
37 avoid multiple enrolments of same participant.  
38  
39  
40  
41  
42

### 43 **Data collection**

44  
45 A standardized questionnaire was administered to each participant by trained nurses,  
46 midwives or social workers (psychosocial agents). This questionnaire allowed the collection of  
47 data on demographics (age, education, marital status, monthly income), awareness of cervical  
48 cancer (existence of the disease, risk factors and prevention), personal history of cervical  
49 cancer screening (date, place, provider, screening method, number of screening conducted).  
50 Additional HIV data (date of HIV infection diagnosis, history of CD4 count measures, clinical  
51 stage at enrolment into HIV care and antiretroviral therapy use) were extracted from the  
52 electronic records of the respective HIV clinics.  
53  
54  
55  
56  
57  
58  
59  
60

### Outcomes and variables

To perform the logistic regression analysis, we defined the uptake of cervical cancer screening using the dichotomic variable “at least one lifetime cervical cancer screening” (yes/no) as the dependent variable. Independent variables were demographic characteristics, HIV follow up characteristics and variable related to awareness of cervical cancer (having heard about cervical cancer, being aware of the relationship with HIV, being aware of the cervical cancer prevention by screening, having been proposed the screening). The educational level was categorized in three modalities: “No formal education or primary level” for women with no formal or primary education level, “secondary level” for women who attend at least one class in secondary school and “university level” for those with university education level. Age of participants was categorized into two modalities (<45 / ≥45) based on previous reports. The marital status was dichotomized as living alone (single, divorced, widowed) or living with a partner (married or engaged with a life partner). To characterize information of cervical cancer, we combine two variables (having heard about cervical cancer and source of information) to create a new variable indicating if the participants has been informed in the HIV clinic or elsewhere “information on cervical cancer”. The time since first positive HIV serology was categorized into three modalities (1-4; 5-9; ≥10 years). We also created a variable to assess the influence of the place and the category of person who proposed the screening, this variable “proposition of screening” has two modalities for participants who had ever been proposed a screening (proposed elsewhere/ proposed in the HIV clinic). The clinical stage was dichotomized into I-II/A-B for the participants with the corresponding WHO or CDC clinical stage in their medical records, and III-IV/C for those with advanced stage disease.

### Statistical analysis

Qualitative variables were described as frequencies with percentages and quantitative variables were described as medians with interquartile range (IQR). Chi square test and Fisher exact test were used for the comparison of qualitative variables. The 95% confidence interval of the proportion of WLHIV covered by cervical cancer screening was estimated using the following formula:  $p \pm Z \cdot \sqrt{p(1-p)/n}$  where n=sample size, p=ratio of the number of WLHIV covered by cervical cancer screening in the sample to the sample size and the Z-value=1.96 for 95% confidence. Logistic regression analysis using a step-wise backward procedure was performed to assess factors associated with uptake of cervical cancer screening among WLHIV. Multivariable analysis was performed including all available variables selected based on their potential association with uptake of cervical cancer screening from the existing literature. All Analyses were performed using STATA V12.0 (Stata Corp, College Station, Texas).

### **Patient and public involvement**

Patients and public were not involved in the design of the study, but the questionnaire was submitted to a panel of WLHIV to identify unclear or confusing questions. Additional insights generated from this panel of women were taken into account in the final version of the questionnaire.

### **Ethic statement**

Ethical approval was obtained from the “Comité National d’Ethique des Sciences de la Vie et de la Santé (CNESVS)”, that is the National Ethic Committee for life Science and Health, the country’s national IRB. The registry number of our study is “IORG00075”. Each participant was given comprehensive information on the protocol of the study and had to provide a written consent before being enrolled.

## RESULTS

### *Sociodemographic and HIV follow-up characteristics*

During the study period, 1,921 women attending their usual HIV clinic for routine follow-up visit were selected and proposed the study, among which eight (0.04%) refused to participate because of lack of time. Overall, 1,991 participants were interviewed with a median age of 42 years (Inter Quartile Range IQR [37-47]). Among them, 1,736 (87.2%) had no formal or primary level or secondary education, 1,055 (53.0%) were married or living with a partner, and 1,052 (52.8%) had no income or earned less than the national minimum wage (\$109). For HIV related characteristics, among the 1,991 participants, 971 (48.8%) were enrolled in the cohort with a WHO clinical stage I or II. The median CD4 count at enrolment in the cohorts was 287 cell/mm<sup>3</sup> (IQR [140-459]), and the last known median CD4 count was 563 cell/mm<sup>3</sup> (IQR [378-773]). The median follow-up duration was 8 years (IQR [4-11]). Most participants (94.9%) initiated antiretroviral treatment (ART) and the median duration on ART was 7 years (IQR [3-10]).

### *Knowledge on cervical cancer*

Off the 1,991 participants 1,913 (96.1%) had previously heard about cervical cancer, among which 1,451 (75.8%) heard about it in their follow up HIV clinic. Among the 1,913 participant who ever heard about cervical cancer, 1,167 (61.0%) stated that the information provided about cervical cancer was understandable and clear. Women with a university education level were more likely to receive a clear and understandable information about cervical cancer than those who were less educated (78.4% vs 63.1% and 55.1%;  $p < 0.001$ ). Cervical cancer was recognized as a preventable disease by 1,443 (75.4%) participants, and screening and HPV vaccine were identified as preventive methods by 1,299 (90.0%) and 423 (29.3%) participants, respectively. Women who reached university were more likely to identify screening as preventive method than the less educated ones (94.8% vs 91.4% and 87.6% respectively,  $p = 0.007$ ). Regarding risk factors for cervical cancer, multiple sexual partner and early sexual initiation were identified by 1,238 (64.7%) and 1,113 (58.2%) participants, respectively. Only 814 (42.5%) participants identified HIV infection as a risk factor for cervical cancer, mainly women at university education level (53.3% vs 41.5% and 40.5%;  $p < 0.001$ ) (Table 1).



**Table 1:** knowledge on cervical cancer and prevention according to education level among women living with HIV in Côte d'Ivoire, West Africa

| Characteristics                                  | Total               | No formal or Primary level | Secondary level    | University level   | P value |
|--------------------------------------------------|---------------------|----------------------------|--------------------|--------------------|---------|
|                                                  | <b>1,991 (100%)</b> | <b>1,057 (53.1%)</b>       | <b>679 (34.1%)</b> | <b>255 (12.8%)</b> |         |
| <b>Ever Heard about CC</b>                       |                     |                            |                    |                    |         |
| Yes                                              | 1,913 (96.1)        | 991 (93.8)                 | 667 (98.2)         | 255 (100.0)        | 0.000   |
| <b>Heard about CC in HIV clinic (N=1,913)</b>    |                     |                            |                    |                    |         |
| Yes                                              | 1,451 (75.8)        | 745 (75.2)                 | 512 (75.8)         | 194 (76.1)         | 0.758   |
| <b>Heard about CC in the media (N=1,913)</b>     |                     |                            |                    |                    |         |
| Yes                                              | 1,236 (64.6)        | 570 (57.5)                 | 459 (68.2)         | 207 (81.2)         | <0.001  |
| <b>Clarity of information received (N=1,913)</b> |                     |                            |                    |                    |         |
| Not clear / I did not understand                 | 743 (39.0)          | 445 (44.9)                 | 246 (36.9)         | 55 (21.6)          | <0.001  |
| Very Clear / I understood it                     | 1,167 (61.0)        | 546 (55.1)                 | 421 (63.1)         | 200 (78.4)         |         |
| <b>CC is a preventable disease (N=1,913)</b>     |                     |                            |                    |                    |         |
| Yes                                              | 1,443 (75.4)        | 707 (71.3)                 | 526 (78.9)         | 210 (82.4)         | 0.001   |
| <b>Means of prevention for CC (N=1,443)</b>      |                     |                            |                    |                    |         |
| Screening                                        | 1,299 (90.0)        | 619 (87.6)                 | 481 (91.4)         | 199 (94.8)         | 0.007   |
| Vaccine                                          | 423 (29.3)          | 199 (28.1)                 | 131 (24.9)         | 91 (43.3)          | <0.001  |
| <b>Risk factors for CC (N=1,913)</b>             |                     |                            |                    |                    |         |
| HIV infection                                    | 814 (42.5)          | 401 (40.5)                 | 277 (41.5)         | 136 (53.3)         | <0.001  |
| Multiple sexual partners                         | 1,238 (64.7)        | 612 (61.8)                 | 448 (67.2)         | 178 (69.8)         | 0.002   |
| Early sexual initiation                          | 1,113 (58.2)        | 519 (52.4)                 | 424 (63.8)         | 170 (66.7)         | <0.001  |

CC: cervical cancer



### *Cervical cancer screening uptake*

Among the 1,913 participants, 1,188 have ever been screened and the overall cervical cancer screening coverage among WLHIV was 59.7% [95%CI (57.6 - 62.0)]. Overall, 1,444 (72.5%) participants had ever been offered cervical cancer screening, most of them in their follow-up HIV clinic (88.9%). The main screening methods were VIA for 1,050 (88.4%) participants and Pap smear for 120 (10.1%) participants. After cervical cancer screening, results were given to 1,146 (96.5%) women and only 778 (65.5%) of them declared having received advise for repeated screening over time. Half of screened participants (48.8%) declared having done the screening because it was advised by the healthcare workers, 328 (27.6%) declared that it was their personal decision and 188 (15.8%) declared having accept it because it was part of a research project in which they were involved. Among the 803 (40.3%) women with no history of cervical cancer screening, the lack of information about cervical cancer (54%), the fear of the result of cervical cancer screening (22%), negligence (15%) and fear of induced cost (10%) were the main reasons (Figure 1).

### *Factors associated with cervical cancer screening uptake*

Being aged  $\geq 45$  years old (aOR=1.4 [1.1;1.8],  $p=0.012$ ), having a university education level (vs no or primary level education) (aOR=2.1 [1.4;3.1],  $p<0.001$ ), receiving information on cervical cancer through their HIV clinic (aOR=1.5 [1.1;2.0],  $p=0.017$ ), having received information on cervical cancer self-perceived as "clear" (aOR=1.7 [1.4;2.2],  $p<0.001$ ), attending their HIV clinic for at least ten years (aOR=1.4 [1.0 ; 1.8],  $p=0.043$ ), identifying HIV as a risk factor of cervical cancer (aOR=1.4 [1.1;1.8],  $p=0.002$ ) and being proposed cervical cancer screening in their HIV clinic (aOR=10.1 [7.6;13.5],  $p<0.001$ ) were associated with cervical cancer screening uptake (Table 2).

**Table 2:** Factors associated with uptake to cervical cancer screening among women living with HIV in Côte d'Ivoire, West Africa

| Variables                           | n/N        | Uni variable model |         | Multivariable model (final) |         |
|-------------------------------------|------------|--------------------|---------|-----------------------------|---------|
|                                     |            | aOR (CI 95%)       | p-value | aOR (CI 95%)                | p-value |
| <b>Age (years)</b>                  |            |                    |         |                             |         |
| <45                                 | 747/1293   | 1                  | -       | 1                           | -       |
| ≥45                                 | 441/698    | 1.3 (1.0 – 1.5)    | 0.019   | 1.4 (1.1 – 1.8)             | 0.012   |
| <b>Marital status</b>               |            |                    |         |                             |         |
| Living alone                        | 623/1083   | 1                  | -       | -                           | -       |
| Living with a partner               | 565/908    | 1.2 (1.0 - 1.4)    | 0.033   | 1.3 (1.0 – 1.6)             | 0.046   |
| <b>Educational level</b>            |            |                    |         |                             |         |
| No formal / primary level           | 568/1057   | 1                  | -       | 1                           | -       |
| Secondary level                     | 430/679    | 1.5 (1.2 – 1.8)    | <0.001  | 1.2 (0.9 - 1.5)             | 0.211   |
| University                          | 190/255    | 2.5 (1.8 – 3.4)    | <0.001  | 2.1 (1.4 - 3.1)             | <0.001  |
| <b>Information on CC</b>            |            |                    |         |                             |         |
| Informed elsewhere                  | 135/535    | 1                  | -       | 1                           | -       |
| Informed in usual HIV clinic        | 1,053/1456 | 7.7 (6.2 – 9.7)    | <0.001  | 1.5 (1.1 – 2.0)             | 0.017   |
| <b>Clarity of information</b>       |            |                    |         |                             |         |
| Not clear for me                    | 341/820    | 1                  | -       | 1                           | -       |
| Very clear for me                   | 847/1171   | 4.0 (3.0 – 4.4)    | <0.001  | 1.7 (1.4 – 2.2)             | <0.001  |
| <b>Proposition of screening</b>     |            |                    |         |                             |         |
| Proposed elsewhere                  | 147/700    | 1                  | -       | 1                           | -       |
| Proposed in usual HIV clinic        | 1041/1291  | 15.7 (12.5 – 19.7) | <0.001  | 10.1 (7.6 – 13.5)           | <0.001  |
| <b>Clinical Stage</b>               |            |                    |         |                             |         |
| III-IV/C                            | 254/519    | 1                  | -       | 1                           | -       |
| I-II/ A-B                           | 572/971    | 1.5 (1.2 – 1.9)    | <0.001  | 1.6 (1.2 – 2.0)             | 0.001   |
| Missing values                      | 362/501    | 2.7 (2.1 – 3.5)    | <0.001  | 1.8 (1.3 - 2.5)             | <0.001  |
| <b>Follow up duration</b>           |            |                    |         |                             |         |
| 1-4                                 | 231/512    | 1                  | -       | 1                           | -       |
| 5-9                                 | 431/720    | 1.8 (1.4- 2.3)     | <0.001  | 1.2 (0.9 – 1.7)             | 0.156   |
| ≥10                                 | 526/759    | 2.7 (2.1 – 3.4)    | <0.001  | 1.4 (1.0 – 1.8)             | 0.043   |
| <b>Knowing HIV as a risk factor</b> |            |                    |         |                             |         |
| No                                  | 631/1172   | 1                  | -       | 1                           | -       |
| Yes                                 | 557/819    | 1.8 (1.5 – 2.2)    | <0.001  | 1.4 (1.1 – 1.8)             | 0.002   |

## DISCUSSION

This study assesses the cervical cancer screening coverage among 1,991 WLHIV in Abidjan, aged 42 years old in median, with low education level and socioeconomic situation, and a clinically and immunologically stable HIV disease. The great majority of women were aware that cervical cancer was accessible to screening, but information received was clear and understood by less than two fifth of them. Uptake of cervical cancer screening was around 60% and was associated with higher education level, clarity of information, onsite cervical cancer screening and identifying HIV as a risk factor for cervical cancer. In addition, lack of information and fear of being diagnosed with cervical cancer were the main reasons reported by WLHIV for not accessing to CC screening.

This study reports that three over five women living with HIV in our study population had been screened for cervical cancer at least once during the last three years. This result is higher than previous reports from Nigeria, Ethiopia and Uganda, where the cervical cancer screening uptake rates were 9.5%, 23.5% and 30.3%, respectively [17,18,23]. This result support the successful integration of cervical cancer screening services in HIV clinics in Cote d'Ivoire. Indeed, since 2010, the national cancer control program and the national aids control program have been involved in the pilot phase of the cervical cancer prevention project (CECAP) supported by ministry of health and implementing partners. The aim was to integrate cervical cancer screening in HIV clinics and improve access to screening for women living with HIV, highly susceptible to cervical cancer. From 2010 to 2015, almost all HIV clinics in Abidjan and the outlying area were equipped for cervical cancer screening and their staff trained to provide cervical cancer screening and treatment of eligible precancerous lesions free of charge [21]. The collaboration between AIDS and cancer control programs led to this successful integration of services that has been described in other SSA countries as a game changer for the prevention of cervical cancer among HIV-infected women [24–26]. The positive effect of this service integration is emphasized in our study by the association between screening uptake and the offer of cervical cancer screening “onsite”, in the HIV clinic were the participant is usually followed. This underlines the importance of scaling up the cervical cancer screening in all HIV clinics, as WLHIV will be more willing to accept the screening when proposed in the health facility they usually attend. Indeed, half of the screened women declared having accept the screening because it was advised by the healthcare worker at the HIV clinic [27].

Despite the important coverage of cervical cancer screening reported in this study, around 40% of WLHIV have never been screened despite their high risk of developing an invasive

1  
2  
3 cervical cancer, usually diagnosed at an advanced stage in SSA [28,29]. Lack of information  
4 was the main reason reported by WLHIV never screened for cervical cancer in Abidjan. This  
5 result suggests that despite efforts from the national cancer program to increase awareness  
6 of cervical cancer among women (either in hospital-based strategy by training healthcare  
7 workers to offer cervical cancer screening or in community-based strategy through awareness  
8 campaign involving community mobilizers), messages to raise awareness on cervical cancer  
9 and its prevention remain poorly disseminated.  
10  
11  
12  
13

14  
15 When analyzing factors associated to cervical cancer screening uptake, it appears that highly  
16 educated women and those who identified HIV as a risk factor for cervical cancer were more  
17 likely to be screened. Thus, misunderstanding of information on cervical cancer remains an  
18 important barrier to screening among WLHIV as reported in other studies [30–33]. In addition,  
19 the important gap (36%) observed between the numbers of women who had been offered  
20 cervical cancer screening and those who have been effectively screened, reported in our  
21 population is consistent with previous study from Uganda [17]. This result underlines the  
22 importance of a tailored communication strategy to take into account factors that influence the  
23 decision to undergo cervical cancer screening, such as low education level, the need for  
24 patient-centered communications and cultural beliefs reported in other SSA countries  
25 [30,32]. In addition to participant-related barriers, providers-related barriers such as lack of  
26 knowledge and failure to inform or encourage women to be screened were reported as  
27 important factors influencing cervical cancer screening uptake in other SSA countries [33]. In  
28 our study the role of health care providers appeared to be central in the decision of WLHIV to  
29 get screened as highlighted by the strong association between screening uptake and  
30 proposition of screening in the usual HIV clinic of the participants. This idea is supported by  
31 the association reported between screening uptake and receiving clear and understood  
32 information on cervical cancer screening from health care providers. Thus, the high rate of  
33 cervical cancer screening uptake reported in this study compared to other SSA countries could  
34 be explained by the influence of health care providers, mostly psychosocial agent who are in  
35 charge of linkage and retention of WLHIV and who are trained to inform WLHIV and refer them  
36 to screening unit. However qualitative studies are needed to deeply explore the provider's  
37 related barriers for screening uptake among the 40% of WLHIV who have never been screened  
38 in the participating HIV clinics.  
39  
40  
41  
42  
43  
44  
45  
46  
47  
48  
49  
50  
51  
52  
53  
54  
55

56 The WHO guideline for prevention and care of cervical cancer among women recommend for  
57 low- and middle-income countries to perform VIA screening for all WLHIV between 30-49 years  
58 old or older for those with visible transformation zone and to repeat the screening test within  
59  
60

1  
2  
3 three years if no lesions. In case of precancerous lesions eligible for treatment, they will have  
4 to attend the screening unit one year after treatment for a follow up visit with the aim of checking  
5 recurrence [34]. To improve the uptake of cervical cancer screening, it is critical to improve  
6 health education and awareness among WLHIV, by reshaping the hospital-based  
7 communication approach for cervical cancer screening. A recent systematic review on  
8 strategies implemented in SSA to improve cervical cancer screening reported that about three  
9 quarter of these strategies include education and awareness activities, but most of them failed  
10 to demonstrate the effectiveness of the strategy [35]. Most of these interventions had  
11 anticipated solution for financial barriers for clients, materials supply and capacity building of  
12 staff, while the main problem is to improve beneficiaries understanding of cervical cancer  
13 prevention messages. Usually, the level of communication on cervical cancer prevention  
14 services is standardized and not adapted to all the social categories. A specific educational  
15 program, which uses culturally sensitive and linguistically appropriate strategies to deliver,  
16 tailored cervical cancer prevention messages could enhance awareness of WLHIV and  
17 increase access to cervical cancer screening. Furthermore, a collaboration between cervical  
18 cancer screening providers and community health educators is critical to improve the  
19 understanding of health education messages as already reported in SSA [36].  
20  
21  
22  
23  
24  
25  
26  
27  
28  
29

30 This study was conducted among WLHIV followed in HIV clinics located in the urban area of  
31 Abidjan. These results may thus mostly reflect the feature in urban settings where people are  
32 more educated and more exposed to cervical cancer awareness activities than in rural settings.  
33 In addition, this study was conducted in the largest and oldest HIV clinics in Abidjan, where  
34 cervical cancer screening is provided free of charge since the initiation of CECAP in 2010  
35 potentially overestimating the overall cervical cancer screening uptake in Abidjan. The cross-  
36 sectional design of the study did not allow us to draw any causal relationship between the  
37 uptake of cervical cancer screening and the reported associated factors. Although the  
38 questionnaire was administered during face-to-face interviews by previously trained monitors,  
39 we cannot exclude bias related to the declarative nature of the collected information, such as  
40 memory bias or social desirability bias. However, the survey was conducted in the four largest  
41 HIV clinics in the country, using a daily-repeated systematic random selection procedure over  
42 a four-month period. This enabled to take into account the heterogeneity of the population  
43 attending these HIV clinics and helped mitigate the risk of selection bias.  
44  
45  
46  
47  
48  
49  
50  
51  
52  
53  
54  
55  
56  
57  
58  
59  
60

## CONCLUSION

Initiatives to support cervical cancer screening in HIV care programs have resulted in effective access to more than half of the WLHIV followed in the three major HIV clinics in Abidjan. Nevertheless, efforts are still needed to provide universal access to cervical cancer screening, which remains an AIDS-defining cancer poorly prevented by antiretroviral treatments compared to Kaposi Sarcoma or Non-Hodgkin Lymphomas. Promoting cervical cancer screening among socio-economically disadvantaged WLHIV by addressing client barriers still need to be prioritized.

### Figure legend caption

**Figure 1:** Reasons for not being screened for cervical cancer among women living with HIV in Côte d'Ivoire, West Africa

### ACKNOWLEDGEMENTS

We would like to warmly thank Pr François Dabis for his advises and orientation when designing and implementing the study, as well as Mr Azany Jean Claude for his strong support in data management and study monitoring.

### Funding:

The study was conducted under the leDEA West Africa collaboration grants funded by the National Cancer Institute (NCI); Eunice Kennedy Shriver National Institute of Child Health & Human Development (NICHD); National Institute of Allergy and Infectious Diseases (NIAID); Grant number: 5U01AI069919.

### Competing interest

None declared.

### Authors Contribution

BT and AJ designed the study. BT, SB, JJK, DKE, AH, AT, EM, SOK, IA and AJ supervised the study implementation and data collection. Statistical analysis was performed by BT, SB and AJ. Data interpretation and first draft of manuscript was done by BT, SB, JJK and AJ. Critical revision of the manuscript for important intellectual content was provided by all the coauthors who read and commented on the original manuscript and all agreed on the version finalized by BT, SB and AJ for submission.

### Data availability statement

All files used in the present analysis will be made available after acceptance of the manuscript at the following URL <https://figshare.com/s/aa30384566ff726358ba> . Authors may be contacted at [boris.tchounga@yahoo.fr](mailto:boris.tchounga@yahoo.fr) and [antoine.jaquet@u-bordeaux.fr](mailto:antoine.jaquet@u-bordeaux.fr).



**REFERENCES**

1. Bray F, Ferlay J, Soerjomataram I, Siegel RL, Torre LA, Jemal A. Global cancer statistics 2018: GLOBOCAN estimates of incidence and mortality worldwide for 36 cancers in 185 countries. *CA Cancer J Clin*. 1 nov 2018;68(6):394-424.
2. International Agency for Research on Cancer. Estimated number of incidence and deaths in 2018, WHO Africa region (AFRO), females, all ages [Internet]. IARC, WHO Cancer Today. 2018 [cité 14 janv 2019]. Disponible sur: <http://gco.iarc.fr/today/home>
3. Xi LF, Demers GW, Koutsky LA, Kiviat NB, Kuypers J, Watts DH, et al. Analysis of Human Papillomavirus Type 16 Variants Indicates Establishment of Persistent Infection. *J Infect Dis*. 1 sept 1995;172(3):747-55.
4. Clifford G, Franceschi S, Diaz M, Muñoz N, Villa LL. Chapter 3: HPV type-distribution in women with and without cervical neoplastic diseases. *Vaccine*. 21 août 2006;24:S26-34.
5. Bonnet F, Lewden C, May T, Heripret L, Jouglu E, Bevilacqua S, et al. Malignancy-related causes of death in human immunodeficiency virus-infected patients in the era of highly active antiretroviral therapy. *Cancer*. 15 juill 2004;101(2):317-24.
6. Massad LS, Ahdieh L, Benning L, Minkoff H, Greenblatt RM, Watts H, et al. Evolution of cervical abnormalities among women with HIV-1: evidence from surveillance cytology in the women's interagency HIV study. *J Acquir Immune Defic Syndr* 1999. 15 août 2001;27(5):432-42.
7. Horo A, Jaquet A, Ekouevi DK, Toure B, Coffie PA, Effi B, et al. Cervical cancer screening by visual inspection in Côte d'Ivoire, operational and clinical aspects according to HIV status. *BMC Public Health*. 23 mars 2012;12:237.
8. Cervical cancer and HIV—two diseases, one response [Internet]. [cité 30 mai 2019]. Disponible sur: <https://www.unaids.org/en/resources/presscentre/featurestories/2018/october/cervical-cancer-and-hiv>
9. Dryden-Peterson S, Bvochora-Nsingo M, Suneja G, Efstathiou JA, Grover S, Chiyapo S, et al. HIV Infection and Survival Among Women With Cervical Cancer. *J Clin Oncol Off J Am Soc Clin Oncol*. 1 nov 2016;34(31):3749-57.
10. World Health Organization. WHO Comprehensive cervical cancer control: a guide to essential practice – 2nd ed. [Internet]. Geneva, Switzerland: WHO; 2014 [cité 15 sept 2017] p. 408. Disponible sur: <http://www.who.int/reproductivehealth/publications/cancers/cervical-cancer-guide/en/>
11. Belhadj H, Rasanathan JJK, Denny L, Broutet N. Sexual and reproductive health and HIV services: integrating HIV/AIDS and cervical cancer prevention and control. *Int J Gynaecol Obstet Off Organ Int Fed Gynaecol Obstet*. mai 2013;121 Suppl 1:S29-34.
12. Tchounga BK, Jaquet A, Coffie PA, Horo A, Sauvaget C, Adoubi I, et al. Cervical cancer prevention in reproductive health services: knowledge, attitudes and practices of midwives in Côte d'Ivoire, West Africa. *BMC Health Serv Res*. 11 avr 2014;14:165.
13. White HL, Meglioli A, Chowdhury R, Nuccio O. Integrating cervical cancer screening and preventive treatment with family planning and HIV-related services. *Int J Gynaecol Obstet Off Organ Int Fed Gynaecol Obstet*. juill 2017;138 Suppl 1:41-6.
14. Barbosa IR. Regional and Socioeconomic Differences in the Coverage of the Papanicolaou Test in Brazil: Data from the Brazilian Health Survey 2013. *Rev Bras Ginecol E Obstet Rev Fed Bras Soc Ginecol E Obstet*. sept 2017;39(9):480-7.



15. Swan J, Breen N, Coates RJ, Rimer BK, Lee NC. Progress in cancer screening practices in the United States: results from the 2000 National Health Interview Survey. *Cancer*. 15 mars 2003;97(6):1528-40.
16. Oussaid N, Lutringer-Magnin D, Barone G, Haesebaert J, Lasset C. Factors associated with Pap smear screening among French women visiting a general practitioner in the Rhône-Alpes region. *Rev Epidemiol Sante Publique*. oct 2013;61(5):437-45.
17. Wanyenze RK, Bwanika JB, Beyeza-Kashesya J, Mugerwa S, Arinaitwe J, Matovu JKB, et al. Uptake and correlates of cervical cancer screening among HIV-infected women attending HIV care in Uganda. *Glob Health Action*. 2017;10(1):1380361.
18. Erku DA, Netere AK, Mersha AG, Abebe SA, Mekuria AB, Belachew SA. Comprehensive knowledge and uptake of cervical cancer screening is low among women living with HIV/AIDS in Northwest Ethiopia. *Gynecol Oncol Res Pract*. 2017;4:20.
19. Ebu NI. Socio-demographic characteristics influencing cervical cancer screening intention of HIV-positive women in the central region of Ghana. *Gynecol Oncol Res Pract*. 2018;5:3.
20. Évaluation de l'impact du VIH dans la population générale en CÔTE D'IVOIRE, CIPHIA 2017-2018 [Internet]. [cité 4 févr 2019]. Disponible sur: [https://phia.icap.columbia.edu/wp-content/uploads/2018/09/3474CIPHIA\\_Cote-D27Ivoire-SS\\_FRENCH.v6.FINAL\\_.pdf](https://phia.icap.columbia.edu/wp-content/uploads/2018/09/3474CIPHIA_Cote-D27Ivoire-SS_FRENCH.v6.FINAL_.pdf)
21. National Cancer Control Program. National guidelines for the cervical cancer prevention, Cote d'Ivoire. National Cancer Control Program (NCCP), Cote d'Ivoire; 2013.
22. UNAIDS. Country factsheets Côte d'Ivoire 2017 [Internet]. [cité 31 mai 2019]. Disponible sur: <https://www.unaids.org/en/regionscountries/countries/ctedivoire>
23. Ezechi OC, Gab-Okafor CV, Ostergren PO, Odberg Pettersson K. Willingness and acceptability of cervical cancer screening among HIV positive Nigerian women. *BMC Public Health*. 17 janv 2013;13:46.
24. Franceschi S, Jaffe H. Cervical cancer screening of women living with HIV infection: a must in the era of antiretroviral therapy. *Clin Infect Dis Off Publ Infect Dis Soc Am*. 15 août 2007;45(4):510-3.
25. Odafe S, Torpey K, Khamofu H, Oladele E, Adedokun O, Chabikuli O, et al. Integrating cervical cancer screening with HIV care in a district hospital in Abuja, Nigeria. *Niger Med J J Niger Med Assoc*. 2013;54(3):176-84.
26. Renewed Partnership to Help End AIDS and Cervical Cancer in Africa [Internet]. [cité 31 mai 2019]. Available on: <https://www.pepfar.gov/press/releases/281984.htm>
27. Implementation Science Graphic Brief in Review: Health Benefits of Linking women to Cervical Cancer Screening in Zambia [Internet]. 2016 [cité 31 mai 2019]. Available on: <https://www.usaid.gov/what-we-do/global-health/hiv-and-aids/information-center/hiv-and-aids-research-corner/cervical-cancer-screening-zambia>
28. Dunyo P, Effah K, Udofia EA. Factors associated with late presentation of cervical cancer cases at a district hospital: a retrospective study. *BMC Public Health*. 3 oct 2018;18(1):1156.
29. Menon MP, Coghill A, Mutyaba IO, Phipps WT, Okuku FM, Harlan JM, et al. Association Between HIV Infection and Cancer Stage at Presentation at the Uganda Cancer Institute. *J Glob Oncol*. sept 2018;(4):1-9.

- 1
- 2
- 3 30. Bukirwa A, Mutyoba JN, Mukasa BN, Karamagi Y, Odiit M, Kawuma E, et al. Motivations
- 4 and barriers to cervical cancer screening among HIV infected women in HIV care: a
- 5 qualitative study. *BMC Womens Health*. 12 oct 2015;15:82.
- 6
- 7 31. Williams M, Kuffour G, Ekuadzi E, Yeboah M, EIDuah M, Tuffour P. Assessment of
- 8 psychological barriers to cervical cancer screening among women in Kumasi, Ghana
- 9 using a mixed methods approach. *Afr Health Sci*. déc 2013;13(4):1054-61.
- 10
- 11 32. Lim JNW, Ojo AA. Barriers to utilisation of cervical cancer screening in Sub Sahara Africa:
- 12 a systematic review. *Eur J Cancer Care (Engl)*. janv 2017;26(1).
- 13
- 14 33. McFarland DM, Gueldner SM, Mogobe KD. Integrated Review of Barriers to Cervical
- 15 Cancer Screening in Sub-Saharan Africa. *J Nurs Scholarsh Off Publ Sigma Theta Tau*
- 16 *Int Honor Soc Nurs*. 2016;48(5):490-8.
- 17
- 18 34. World Health Organization, éditeur. WHO guidelines for screening and treatment of
- 19 precancerous lesions for cervical cancer prevention. Geneva: World Health Organization;
- 20 2013. 40 p.
- 21
- 22 35. Johnson LG, Armstrong A, Joyce CM, Teitelman AM, Buttenheim AM. Implementation
- 23 strategies to improve cervical cancer prevention in sub-Saharan Africa: a systematic
- 24 review. *Implement Sci IS*. 09 2018;13(1):28.
- 25
- 26 36. Uy C, Lopez J, Trinh-Shevrin C, Kwon SC, Sherman SE, Liang PS. Text Messaging
- 27 Interventions on Cancer Screening Rates: A Systematic Review. *J Med Internet Res*. 24
- 28 août 2017;19(8):e296.
- 29
- 30
- 31
- 32
- 33
- 34
- 35
- 36
- 37
- 38
- 39
- 40
- 41
- 42
- 43
- 44
- 45
- 46
- 47
- 48
- 49
- 50
- 51
- 52
- 53
- 54
- 55
- 56
- 57
- 58
- 59
- 60

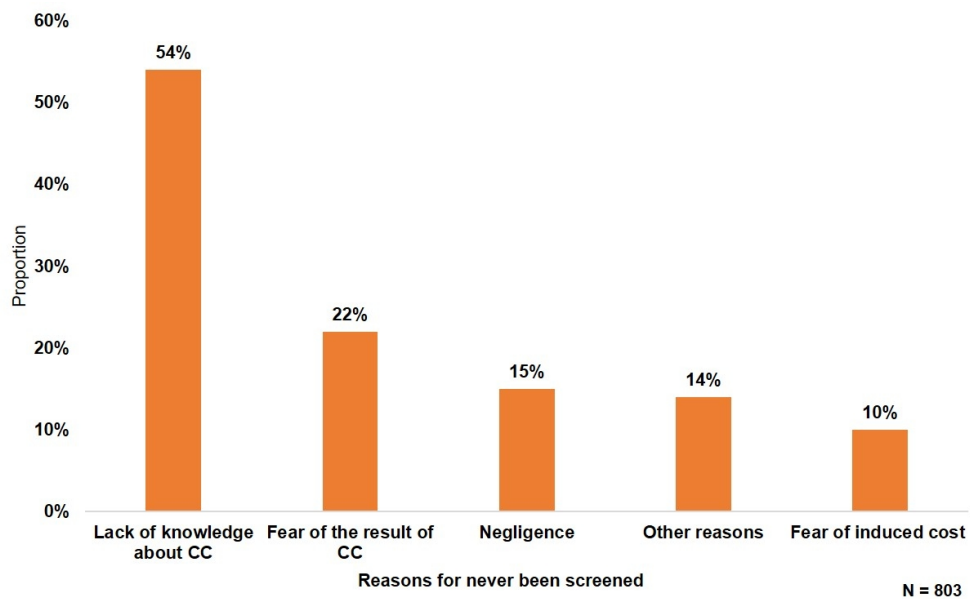

Figure 1: Reasons for not being screened for cervical cancer among women living with HIV in Côte d'Ivoire, West Africa

207x126mm (150 x 150 DPI)

STROBE Statement—Checklist of items that should be included in reports of *cross-sectional studies*

|                              | Item No | Recommendation                                                                                                                                                                                               | Page No |
|------------------------------|---------|--------------------------------------------------------------------------------------------------------------------------------------------------------------------------------------------------------------|---------|
| <b>Title and abstract</b>    | 1       | (a) Indicate the study's design with a commonly used term in the title or the abstract                                                                                                                       | 1       |
|                              |         | (b) Provide in the abstract an informative and balanced summary of what was done and what was found                                                                                                          | 2       |
| <b>Introduction</b>          |         |                                                                                                                                                                                                              |         |
| Background/rationale         | 2       | Explain the scientific background and rationale for the investigation being reported                                                                                                                         | 3       |
| Objectives                   | 3       | State specific objectives, including any prespecified hypotheses                                                                                                                                             | 3       |
| <b>Methods</b>               |         |                                                                                                                                                                                                              |         |
| Study design                 | 4       | Present key elements of study design early in the paper                                                                                                                                                      | 4       |
| Setting                      | 5       | Describe the setting, locations, and relevant dates, including periods of recruitment, exposure, follow-up, and data collection                                                                              | 4       |
| Participants                 | 6       | (a) Give the eligibility criteria, and the sources and methods of selection of participants                                                                                                                  | 4       |
| Variables                    | 7       | Clearly define all outcomes, exposures, predictors, potential confounders, and effect modifiers. Give diagnostic criteria, if applicable                                                                     | 4       |
| Data sources/<br>measurement | 8*      | For each variable of interest, give sources of data and details of methods of assessment (measurement). Describe comparability of assessment methods if there is more than one group                         | 4       |
| Bias                         | 9       | Describe any efforts to address potential sources of bias                                                                                                                                                    | 4       |
| Study size                   | 10      | Explain how the study size was arrived at                                                                                                                                                                    | 4       |
| Quantitative variables       | 11      | Explain how quantitative variables were handled in the analyses. If applicable, describe which groupings were chosen and why                                                                                 | 4       |
| Statistical methods          | 12      | (a) Describe all statistical methods, including those used to control for confounding                                                                                                                        | 4       |
|                              |         | (b) Describe any methods used to examine subgroups and interactions                                                                                                                                          | 4       |
|                              |         | (c) Explain how missing data were addressed                                                                                                                                                                  | 4       |
|                              |         | (d) If applicable, describe analytical methods taking account of sampling strategy                                                                                                                           |         |
|                              |         | (e) Describe any sensitivity analyses                                                                                                                                                                        |         |
| <b>Results</b>               |         |                                                                                                                                                                                                              |         |
| Participants                 | 13*     | (a) Report numbers of individuals at each stage of study—eg numbers potentially eligible, examined for eligibility, confirmed eligible, included in the study, completing follow-up, and analysed            | 6       |
|                              |         | (b) Give reasons for non-participation at each stage                                                                                                                                                         |         |
|                              |         | (c) Consider use of a flow diagram                                                                                                                                                                           |         |
| Descriptive data             | 14*     | (a) Give characteristics of study participants (eg demographic, clinical, social) and information on exposures and potential confounders                                                                     | 6       |
|                              |         | (b) Indicate number of participants with missing data for each variable of interest                                                                                                                          |         |
| Outcome data                 | 15*     | Report numbers of outcome events or summary measures                                                                                                                                                         | 6       |
| Main results                 | 16      | (a) Give unadjusted estimates and, if applicable, confounder-adjusted estimates and their precision (eg, 95% confidence interval). Make clear which confounders were adjusted for and why they were included | 6       |

|                          |    |                                                                                                                                                                            |    |
|--------------------------|----|----------------------------------------------------------------------------------------------------------------------------------------------------------------------------|----|
|                          |    | (b) Report category boundaries when continuous variables were categorized                                                                                                  | 6  |
|                          |    | (c) If relevant, consider translating estimates of relative risk into absolute risk for a meaningful time period                                                           | 6  |
| Other analyses           | 17 | Report other analyses done—eg analyses of subgroups and interactions, and sensitivity analyses                                                                             | 7  |
| <b>Discussion</b>        |    |                                                                                                                                                                            |    |
| Key results              | 18 | Summarise key results with reference to study objectives                                                                                                                   | 8  |
| Limitations              | 19 | Discuss limitations of the study, taking into account sources of potential bias or imprecision. Discuss both direction and magnitude of any potential bias                 | 9  |
| Interpretation           | 20 | Give a cautious overall interpretation of results considering objectives, limitations, multiplicity of analyses, results from similar studies, and other relevant evidence | 8  |
| Generalisability         | 21 | Discuss the generalisability (external validity) of the study results                                                                                                      | 10 |
| <b>Other information</b> |    |                                                                                                                                                                            |    |
| Funding                  | 22 | Give the source of funding and the role of the funders for the present study and, if applicable, for the original study on which the present article is based              | 11 |

\*Give information separately for exposed and unexposed groups.

**Note:** An Explanation and Elaboration article discusses each checklist item and gives methodological background and published examples of transparent reporting. The STROBE checklist is best used in conjunction with this article (freely available on the Web sites of PLoS Medicine at <http://www.plosmedicine.org/>, Annals of Internal Medicine at <http://www.annals.org/>, and Epidemiology at <http://www.epidem.com/>). Information on the STROBE Initiative is available at [www.strobe-statement.org](http://www.strobe-statement.org).

# BMJ Open

## Cervical cancer screening Uptake and correlates among HIV-infected women: a cross-sectional survey in Côte d'Ivoire, West Africa

|                                 |                                                                                                                                                                                                                                                                                                                                                                                                                                                                                                                                                                                                                                                                                                                                                                                                                                                                                                                                                                                                                                                                                                                                                                                                                     |
|---------------------------------|---------------------------------------------------------------------------------------------------------------------------------------------------------------------------------------------------------------------------------------------------------------------------------------------------------------------------------------------------------------------------------------------------------------------------------------------------------------------------------------------------------------------------------------------------------------------------------------------------------------------------------------------------------------------------------------------------------------------------------------------------------------------------------------------------------------------------------------------------------------------------------------------------------------------------------------------------------------------------------------------------------------------------------------------------------------------------------------------------------------------------------------------------------------------------------------------------------------------|
| Journal:                        | <i>BMJ Open</i>                                                                                                                                                                                                                                                                                                                                                                                                                                                                                                                                                                                                                                                                                                                                                                                                                                                                                                                                                                                                                                                                                                                                                                                                     |
| Manuscript ID                   | bmjopen-2019-029882.R2                                                                                                                                                                                                                                                                                                                                                                                                                                                                                                                                                                                                                                                                                                                                                                                                                                                                                                                                                                                                                                                                                                                                                                                              |
| Article Type:                   | Research                                                                                                                                                                                                                                                                                                                                                                                                                                                                                                                                                                                                                                                                                                                                                                                                                                                                                                                                                                                                                                                                                                                                                                                                            |
| Date Submitted by the Author:   | 02-Jul-2019                                                                                                                                                                                                                                                                                                                                                                                                                                                                                                                                                                                                                                                                                                                                                                                                                                                                                                                                                                                                                                                                                                                                                                                                         |
| Complete List of Authors:       | Tchounga, Boris; Programme PACCI, Site ANRS; Elizabeth Glaser Pediatric AIDS Foundation, Yaoundé, Cameroon<br>Boni, Simon Pierre; Programme PACCI, Site ANRS; Programme National de Lutte contre le Cancer, Research Abidjan, CI<br>Koffi, Jean Jacques ; Programme PACCI, Site ANRS<br>Horo, Apollinaire; Service de Gynécologie obstétrique, CHU de Yopougon, Abidjan, Côte d'Ivoire<br>Tanon, Aristophane ; Service des Maladies Infectieuses et Tropicales, CHU de Treichville, Abidjan, Côte d'Ivoire<br>Messou, Eugène; Centre de Prise en Charge de Recherche et de Formation CEPREF Abidjan, Côte d'Ivoire<br>Koulé, Serge-Olivier; Unité de soins ambulatoires et de conseils d'Abidjan, USAC Abidjan, Côte d'Ivoire<br>Adoubi, Innocent ; Service de cancérologie CHU de Treichville, Abidjan Côte d'Ivoire<br>Ekouevi, Didier; Université de Lomé, Département des Sciences Fondamentales et Santé Publique, Lomé, Togo; Centre Inserm 1219 & Institut de Santé Publique d'épidémiologie et de développement, Université de Bordeaux, Bordeaux, France<br>Jaquet, Antoine; Centre Inserm 1219 & Institut de Santé Publique d'épidémiologie et de développement, Université de Bordeaux, Bordeaux, France |
| <b>Primary Subject Heading</b>: | Public health                                                                                                                                                                                                                                                                                                                                                                                                                                                                                                                                                                                                                                                                                                                                                                                                                                                                                                                                                                                                                                                                                                                                                                                                       |
| Secondary Subject Heading:      | Epidemiology, HIV/AIDS, Oncology                                                                                                                                                                                                                                                                                                                                                                                                                                                                                                                                                                                                                                                                                                                                                                                                                                                                                                                                                                                                                                                                                                                                                                                    |
| Keywords:                       | Cervical cancer, screening uptake, HIV                                                                                                                                                                                                                                                                                                                                                                                                                                                                                                                                                                                                                                                                                                                                                                                                                                                                                                                                                                                                                                                                                                                                                                              |
|                                 |                                                                                                                                                                                                                                                                                                                                                                                                                                                                                                                                                                                                                                                                                                                                                                                                                                                                                                                                                                                                                                                                                                                                                                                                                     |

SCHOLARONE™  
Manuscripts

1  
2  
3 **Cervical cancer screening Uptake and correlates among HIV-infected women: a**  
4 **cross-sectional survey in Côte d'Ivoire, West Africa**  
5  
6

7 Boris K. Tchounga<sup>1,2</sup>; Simon P. Boni<sup>1,3</sup>; Jean J. Koffi<sup>1</sup>; Apollinaire G. Horo<sup>4</sup>;  
8 Aristophane Tanon<sup>5</sup>; Eugène Messou<sup>6</sup>; Serge-Olivier Koulé<sup>7</sup>; Innocent Adoubi<sup>3,8</sup>;  
9 Didier K. Ekouevi<sup>1,9,10</sup>; Antoine Jaquet<sup>10</sup>; for the leDEA West Africa Collaboration.  
10  
11

- 12  
13 1. Programme PACCI /site ANRS Abidjan, Abidjan, Cote d'Ivoire  
14  
15 2. Elizabeth Glaser Pediatric AIDS Foundation, Yaoundé, Cameroon  
16  
17 3. Programme National de Lutte contre le Cancer, Abidjan Côte d'Ivoire  
18  
19 4. Service de Gynécologie Obstétrique, CHU de Yopougon, Abidjan, Côte d'Ivoire  
20  
21 5. Service des Maladies Infectieuses et Tropicales, CHU de Treichville, Abidjan, Côte d'Ivoire  
22  
23 6. Centre de Prise en Charge de Recherche et de Formation CEPREF Abidjan, Côte d'Ivoire  
24  
25 7. Unité de soins ambulatoires et de conseils d'Abidjan, USAC Abidjan, Côte d'Ivoire  
26  
27 8. Service de cancérologie CHU de Treichville, Abidjan Côte d'Ivoire  
28  
29 9. Université de Lomé, Département des Sciences Fondamentales et Santé Publique, Lomé,  
30 Togo  
31  
32  
33 10. Centre Inserm 1219 & Institut de Santé Publique d'épidémiologie et de développement,  
34 Université de Bordeaux, Bordeaux, France  
35  
36  
37  
38  
39

40 **Corresponding Author:**

41 Boris Tchounga MD, PHD  
42 Programme PACCI /site ANRS Abidjan,  
43 Abidjan, Côte d'Ivoire  
44 Mail: boris.tchounga@yahoo.fr  
45  
46

47 Number of words: 3,448

48 Number of tables: 2

49 Number of figures: 1  
50  
51  
52  
53  
54  
55  
56  
57  
58  
59  
60

## ABSTRACT

**Objectives:** Despite the increasing number of interventions aiming to integrate cervical cancer screening into HIV clinics in sub-Saharan Africa, Women living with HIV (WLHIV) still have a high risk of developing cervical cancer. The aim of this study was to estimate the coverage of cervical cancer screening and associated factors among WLHIV in Abidjan, Côte d'Ivoire.

**Design:** Cross-sectional survey conducted from May to August 2017.

**Settings:** Outpatient setting in the four highest volume urban HIV clinics of government's or NGO's sector in Côte d'Ivoire.

**Participants:** All WLHIV, aged 25 to 55 years, followed since at least one year, selected through a systematic sampling procedure.

**Intervention:** A standardized questionnaire administered to each participant by trained healthcare workers.

**Outcome:** Cervical cancer screening uptake

**Results:** A total of 1,991 WLHIV were included in the study, aged in median 42 years [(IQR): 38-47], and a median CD4 count (last known) of 560 [379-773] cells/mm<sup>3</sup>. Among the participants, 1,913 (96.7%) had ever heard about cervical cancer, 1,444 (72.5%) had been offered cervical cancer screening, mainly in the HIV clinic for 1,244 (88.9%), and 1148 reported a personal history of cervical cancer screening for an overall coverage of 59.7% [CI 57.6 - 62.0]. In multivariable analysis, university level (aOR=2.1 [1.4;3.1], p<0.001), being informed on cervical cancer at the HIV clinic (aOR=1.5 [1.1;2.0], p=0.017), receiving information self-perceived as "clear and understood" on cervical cancer (aOR=1.7[1.4;2.2], p<0.001), identifying HIV as a risk factor for cervical cancer (aOR=1.4[1.1;1.8], p=0.002) and being proposed cervical cancer screening in the HIV clinic (aOR=10.1 [7.6;13.5], p<0.001), were associated with cervical cancer screening uptake.

**Conclusion:** Initiatives to support cervical cancer screening in HIV care programs resulted in effective access to more than half of the WLHIV in Abidjan. Efforts are still needed to provide universal access to cervical cancer screening, especially among socio-economically disadvantaged WLHIV.

**Key words:** Cervical cancer; screening Uptake; HIV; ART



### Strengths and limitations of this study

- This study reports the cervical cancer screening coverage among women living with HIV in Côte d'Ivoire, a country with one of the highest HIV prevalence among women.
- The methodological approach used in this study allowed the enrolment of a quite representative sample of WLHIV visiting the participating HIV clinics.
- Reasons for not being screened and factors associated with cervical cancer screening uptake were explored through face-to-face interviews.
- The specificity of rural area was not directly explored with this population.
- The data collected are declarative information, collected through face-to-face interviews with possible memory and social desirability bias.

## Introduction

Cervical cancer is the fourth most common cancer in women worldwide, with an estimated incidence of 570 000 new cases and approximately 311 000 new associated deaths in 2018 [1]. In sub Saharan Africa, cervical cancer account for 20.8% of all cancers in women and 14.2% of all cancer related deaths in women [2].

Persistent infection with oncogenic Human Papilloma Viruses (HPV) is a necessary cofactor for cervical cancer, responsible for the development of precancerous lesions that lead to invasive cervical cancer, if left untreated [3]. Infection with human immunodeficiency virus (HIV) is known to accelerates the development of precancerous lesions leading to a higher risk of cervical cancer [4,5]. Infection with HIV is also associated with more extensive lesions of the cervix, three to five times more common in women living with HIV/AIDS (WLHIV) than in those with no history of HIV [6–8]. In addition, a two-fold increase in the risk of death due to cervical cancer was reported in WLHIV compared to their HIV-negative counterparts [9].

The long asymptomatic phase and slow disease progression from the persistent infection with oncogenic HPV to invasive carcinoma, make cervical cancer a highly preventable cancer through screening and HPV immunization [10]. Since 2012, a cervical cancer prevention strategy based on integration of visual inspection of the cervix with acetic acid (VIA) in reproductive health and family planning services has been adopted in many African countries in order to increase access to cervical cancer screening services [11–13]. Cervical cancer screening uptake among women in developed settings is relatively high, 79.4% in Brazil [14], 60% in United States [15], and 89.1% in France [16], mainly with Pap smears. In developing countries, recent studies conducted in Ethiopia and Uganda revealed a low cervical cancer screening uptake of 23.5% and 30.3%, respectively [17,18] and emphasized the importance of sociodemographic factors and attitude of healthcare providers on the decision of beneficiaries to attend cervical cancer screening units [18,19].

In West Africa, Cote d'Ivoire has the highest HIV prevalence among women (4.1%) [20]. Cervical cancer is the second most common cancer among women accounting for 28.6% of all women's cancers and the leading cause of cancer deaths with 22.2% of all cancer related deaths [2]. The national guidelines on cervical cancer screening in the country are aligned with WHO guidelines for low- and middle-income countries, and recommend the screen-and-treat approach based preferentially on visual inspection with acetic acid or pap smear and cryotherapy or electrocoagulation, respectively. This recommendation targets women between 25 and 55 years old in the general population, and those diagnosed with HIV who should be systematically offered a screening per year once linked to HIV care [21]. These guidelines

1  
2  
3 relied on the screening program that was piloted in HIV clinics from 2008 to 2012 before being  
4 scaled up in all the government health facilities and at national level. However, data on the  
5 national coverage of cervical cancer screening among women in Côte d'Ivoire are currently  
6 not available. The only data available on the coverage of cervical cancer screening among  
7 WLHIV is the 10% UNAIDS estimates based on the data from 2011-12 Demographic and  
8 Health Survey [22]. The aim of this study was to estimate the uptake of cervical cancer  
9 screening and its correlates among WLHIV in Abidjan, the economic capital of Côte d'Ivoire.  
10  
11  
12  
13  
14  
15  
16  
17

## 18 **METHOD**

### 19 **Study design and setting**

20  
21  
22 A cross-sectional survey was conducted from May to August 2017 among WLHIV followed in  
23 the four HIV clinics with the highest number of persons actively followed in Abidjan, Côte  
24 d'Ivoire. During the study period, all women aged 25 to 55 years, followed in these HIV clinics  
25 since at least one year, were eligible to participate.  
26  
27  
28

### 29 **Sampling**

30  
31  
32 Participants were selected through a systematic sampling procedure. For every woman  
33 presenting at the HIV clinic for a routine follow-up visit, eligibility criteria were checked at the  
34 entrance desk and a sequential number was given to each eligible participant according to the  
35 arrival order. The first eligible participant of the day was selected and a sampling interval of  
36 three was applied to select subsequent participants. This procedure was repeated every day  
37 in each participating HIV clinics and a sticker was pasted on medical record of participants to  
38 avoid multiple enrolments of same participant.  
39  
40  
41  
42

### 43 **Data collection**

44  
45  
46 A standardized questionnaire was administered to each participant by trained nurses,  
47 midwives or social workers (psychosocial agents). The questionnaire was administered in  
48 French, the official language of the country, but each participant has the possibility to ask  
49 for a translator and a witness to assist in case she was not able to read or understand  
50 French. This questionnaire allowed the collection of data on demographics (age, education,  
51 marital status, monthly income), awareness of cervical cancer (existence of the disease, risk  
52 factors and prevention), personal history of cervical cancer screening (date, place, provider,  
53 screening method, number of screening conducted). Additional HIV data (date of HIV infection  
54 diagnosis, history of CD4 count measures, clinical stage at enrolment into HIV care and  
55  
56  
57  
58  
59  
60

antiretroviral therapy use) were extracted from the electronic records of the respective HIV clinics.

### Outcomes and variables

To perform the logistic regression analysis, we defined the uptake of cervical cancer screening using the dichotomic variable “at least one lifetime cervical cancer screening” (yes/no) as the dependent variable. Independent variables were demographic characteristics, HIV follow up characteristics and variable related to awareness of cervical cancer (having heard about cervical cancer, being aware of the relationship with HIV, being aware of the cervical cancer prevention by screening, having been proposed the screening). The educational level was categorized in three modalities: “No formal education or primary level” for women with no formal or primary education level, “secondary level” for women who attend at least one class in secondary school and “university level” for those with university education level. Age of participants was categorized into two modalities (<45 / ≥45) based on previous reports. The marital status was dichotomized as living alone (single, divorced, widowed) or living with a partner (married or engaged with a life partner). To characterize information of cervical cancer, we combine two variables (having heard about cervical cancer and source of information) to create a new variable indicating if the participants has been informed in the HIV clinic or elsewhere “information on cervical cancer”. The time since first positive HIV serology was categorized into three modalities (1-4; 5-9; ≥10 years). We also created a variable to assess the influence of the place and the category of person who proposed the screening, this variable “proposition of screening” has two modalities for participants who had ever been proposed a screening (proposed elsewhere/ proposed in the HIV clinic). The clinical stage was dichotomized into I-II/A-B for the participants with the corresponding WHO or CDC clinical stage in their medical records, and III-IV/C for those with advanced stage disease.

### Statistical analysis

Qualitative variables were described as frequencies with percentages and quantitative variables were described as medians with interquartile range (IQR). Chi square test and Fisher exact test were used for the comparison of qualitative variables. The 95% confidence interval of the proportion of WLHIV covered by cervical cancer screening was estimated using the following formula:  $p \pm Z \cdot \sqrt{p(1-p)/n}$  where  $n$ =sample size,  $p$ =ratio of the number of WLHIV covered by cervical cancer screening in the sample to the sample size and the  $Z$ -value=1.96 for 95% confidence. Logistic regression analysis using a stepwise backward procedure was performed to assess factors associated with uptake of cervical cancer screening among

1  
2  
3 WLHIV. Multivariable analysis was performed including all available variables selected based  
4 on their potential association with uptake of cervical cancer screening from the existing  
5 literature. All Analyses were performed using STATA V12.0 (Stata Corp, College Station,  
6 Texas).  
7  
8  
9

### 10 11 **Patient and public involvement** 12

13  
14 Patients and public were not involved in the design of the study, but the questionnaire was  
15 submitted to a panel of WLHIV to identify unclear or confusing questions. Additional insights  
16 generated from this panel of women were taken into account in the final version of the  
17 questionnaire.  
18  
19

### 20 21 22 **Ethic statement** 23

24  
25 Ethical approval was obtained from the "Comité National d'Ethique des Sciences de la Vie et  
26 de la Santé (CNESVS)", that is the National Ethic Committee for life Science and Health, the  
27 country's national IRB. The registry number of our study is "IORG00075". Each participant was  
28 given comprehensive information on the protocol of the study and had to provide a written  
29 consent before being enrolled.  
30  
31  
32  
33  
34  
35  
36  
37  
38  
39  
40  
41  
42  
43  
44  
45  
46  
47  
48  
49  
50  
51  
52  
53  
54  
55  
56  
57  
58  
59  
60

## RESULTS

### *Sociodemographic and HIV follow-up characteristics*

During the study period, 1,921 women attending their usual HIV clinic for routine follow-up visit were selected and proposed the study, among which eight (0.04%) refused to participate because of lack of time. Overall, 1,991 participants were interviewed with a median age of 42 years (Inter Quartile Range IQR [37-47]). Among them, 1,736 (87.2%) had no formal or primary level or secondary education, 1,055 (53.0%) were married or living with a partner, and 1,052 (52.8%) had no income or earned less than the national minimum wage (\$109). For HIV related characteristics, among the 1,991 participants, 971 (48.8%) were enrolled in the cohort with a WHO clinical stage I or II. The median CD4 count at enrolment in the cohorts was 287 cell/mm<sup>3</sup> (IQR [140-459]), and the last known median CD4 count was 563 cell/mm<sup>3</sup> (IQR [378-773]). The median follow-up duration was 8 years (IQR [4-11]). Most participants (94.9%) initiated antiretroviral treatment (ART) and the median duration on ART was 7 years (IQR [3-10]).

### *Knowledge on cervical cancer*

Off the 1,991 participants 1,913 (96.1%) had previously heard about cervical cancer, among which 1,451 (75.8%) heard about it in their follow up HIV clinic. Among the 1,913 participant who ever heard about cervical cancer, 1,167 (61.0%) stated that the information provided about cervical cancer was understandable and clear. Women with a university education level were more likely to receive a clear and understandable information about cervical cancer than those who were less educated (78.4% vs 63.1% and 55.1%;  $p < 0.001$ ). Cervical cancer was recognized as a preventable disease by 1,443 (75.4%) participants, and screening and HPV vaccine were identified as preventive methods by 1,299 (90.0%) and 423 (29.3%) participants, respectively. Women who reached university were more likely to identify screening as preventive method than the less educated ones (94.8% vs 91.4% and 87.6% respectively,  $p = 0.007$ ). Regarding risk factors for cervical cancer, multiple sexual partner and early sexual initiation were identified by 1,238 (64.7%) and 1,113 (58.2%) participants, respectively. Only 814 (42.5%) participants identified HIV infection as a risk factor for cervical cancer, mainly women at university education level (53.3% vs 41.5% and 40.5%;  $p < 0.001$ ) (Table 1).

**Table 1:** Knowledge on cervical cancer and prevention according to education level among women living with HIV in Côte d'Ivoire, West Africa

| Characteristics                                  | Total               | No formal or Primary level | Secondary level    | University level   | P value |
|--------------------------------------------------|---------------------|----------------------------|--------------------|--------------------|---------|
|                                                  | <b>1,991 (100%)</b> | <b>1,057 (53.1%)</b>       | <b>679 (34.1%)</b> | <b>255 (12.8%)</b> |         |
| <b>Ever Heard about CC</b>                       |                     |                            |                    |                    |         |
| Yes                                              | 1,913 (96.1)        | 991 (93.8)                 | 667 (98.2)         | 255 (100.0)        | 0.000   |
| <b>Heard about CC in HIV clinic (N=1,913)</b>    |                     |                            |                    |                    |         |
| Yes                                              | 1,451 (75.8)        | 745 (75.2)                 | 512 (75.8)         | 194 (76.1)         | 0.758   |
| <b>Heard about CC in the media (N=1,913)</b>     |                     |                            |                    |                    |         |
| Yes                                              | 1,236 (64.6)        | 570 (57.5)                 | 459 (68.2)         | 207 (81.2)         | <0.001  |
| <b>Clarity of information received (N=1,913)</b> |                     |                            |                    |                    |         |
| Not clear / I did not understand                 | 743 (39.0)          | 445 (44.9)                 | 246 (36.9)         | 55 (21.6)          | <0.001  |
| Very Clear / I understood it                     | 1,167 (61.0)        | 546 (55.1)                 | 421 (63.1)         | 200 (78.4)         |         |
| <b>CC is a preventable disease (N=1,913)</b>     |                     |                            |                    |                    |         |
| Yes                                              | 1,443 (75.4)        | 707 (71.3)                 | 526 (78.9)         | 210 (82.4)         | 0.001   |
| <b>Means of prevention for CC (N=1,443)</b>      |                     |                            |                    |                    |         |
| Screening                                        | 1,299 (90.0)        | 619 (87.6)                 | 481 (91.4)         | 199 (94.8)         | 0.007   |
| Vaccine                                          | 423 (29.3)          | 199 (28.1)                 | 131 (24.9)         | 91 (43.3)          | <0.001  |
| <b>Risk factors for CC (N=1,913)</b>             |                     |                            |                    |                    |         |
| HIV infection                                    | 814 (42.5)          | 401 (40.5)                 | 277 (41.5)         | 136 (53.3)         | <0.001  |
| Multiple sexual partners                         | 1,238 (64.7)        | 612 (61.8)                 | 448 (67.2)         | 178 (69.8)         | 0.002   |
| Early sexual initiation                          | 1,113 (58.2)        | 519 (52.4)                 | 424 (63.8)         | 170 (66.7)         | <0.001  |

CC: cervical cancer

### *Cervical cancer screening uptake*

Among the 1,913 participants, 1,188 have ever been screened and the overall cervical cancer screening coverage among WLHIV was 59.7% [95%CI (57.6 - 62.0)]. Overall, 1,444 (72.5%) participants had ever been offered cervical cancer screening, most of them in their follow-up HIV clinic (88.9%). The main screening methods were VIA for 1,050 (88.4%) participants and Pap smear for 120 (10.1%) participants. After cervical cancer screening, results were given to 1,146 (96.5%) women and only 778 (65.5%) of them declared having received advise for repeated screening over time. Half of screened participants (48.8%) declared having done the screening because it was advised by the healthcare workers, 328 (27.6%) declared that it was their personal decision and 188 (15.8%) declared having accept it because it was part of a research project in which they were involved. Among the 803 (40.3%) women with no history of cervical cancer screening, the lack of information about cervical cancer (54%), the fear of the result of cervical cancer screening (22%), negligence (15%) and fear of induced cost (10%) were the main reasons (Figure 1).

### *Factors associated with cervical cancer screening uptake*

Being aged  $\geq 45$  years old (aOR=1.4 [1.1;1.8],  $p=0.012$ ), having a university education level (vs no or primary level education) (aOR=2.1 [1.4;3.1],  $p<0.001$ ), receiving information on cervical cancer through their HIV clinic (aOR=1.5 [1.1;2.0],  $p=0.017$ ), having received information on cervical cancer self-perceived as "clear" (aOR=1.7 [1.4;2.2],  $p<0.001$ ), attending their HIV clinic for at least ten years (aOR=1.4 [1.0 ; 1.8],  $p=0.043$ ), identifying HIV as a risk factor of cervical cancer (aOR=1.4 [1.1;1.8],  $p=0.002$ ) and being proposed cervical cancer screening in their HIV clinic (aOR=10.1 [7.6;13.5],  $p<0.001$ ) were associated with cervical cancer screening uptake (Table 2).



**Table 2:** Factors associated with uptake to cervical cancer screening among women living with HIV in Côte d'Ivoire, West Africa

| Variables                           | n/N        | Uni variable model |         | Multivariable model (final) |         |
|-------------------------------------|------------|--------------------|---------|-----------------------------|---------|
|                                     |            | aOR (CI 95%)       | p-value | aOR (CI 95%)                | p-value |
| <b>Age (years)</b>                  |            |                    |         |                             |         |
| <45                                 | 747/1293   | 1                  | -       | 1                           | -       |
| ≥45                                 | 441/698    | 1.3 (1.0 – 1.5)    | 0.019   | 1.4 (1.1 – 1.8)             | 0.012   |
| <b>Marital status</b>               |            |                    |         |                             |         |
| Living alone                        | 623/1083   | 1                  | -       | -                           | -       |
| Living with a partner               | 565/908    | 1.2 (1.0 - 1.4)    | 0.033   | 1.3 (1.0 – 1.6)             | 0.046   |
| <b>Educational level</b>            |            |                    |         |                             |         |
| No formal / primary level           | 568/1057   | 1                  | -       | 1                           | -       |
| Secondary level                     | 430/679    | 1.5 (1.2 – 1.8)    | <0.001  | 1.2 (0.9 - 1.5)             | 0.211   |
| University                          | 190/255    | 2.5 (1.8 – 3.4)    | <0.001  | 2.1 (1.4 - 3.1)             | <0.001  |
| <b>Information on CC</b>            |            |                    |         |                             |         |
| Informed elsewhere                  | 135/535    | 1                  | -       | 1                           | -       |
| Informed in usual HIV clinic        | 1,053/1456 | 7.7 (6.2 – 9.7)    | <0.001  | 1.5 (1.1 – 2.0)             | 0.017   |
| <b>Clarity of information</b>       |            |                    |         |                             |         |
| Not clear for me                    | 341/820    | 1                  | -       | 1                           | -       |
| Very clear for me                   | 847/1171   | 4.0 (3.0 – 4.4)    | <0.001  | 1.7 (1.4 – 2.2)             | <0.001  |
| <b>Proposition of screening</b>     |            |                    |         |                             |         |
| Proposed elsewhere                  | 147/700    | 1                  | -       | 1                           | -       |
| Proposed in usual HIV clinic        | 1041/1291  | 15.7 (12.5 – 19.7) | <0.001  | 10.1 (7.6 – 13.5)           | <0.001  |
| <b>Clinical Stage</b>               |            |                    |         |                             |         |
| III-IV/C                            | 254/519    | 1                  | -       | 1                           | -       |
| I-II/ A-B                           | 572/971    | 1.5 (1.2 – 1.9)    | <0.001  | 1.6 (1.2 – 2.0)             | 0.001   |
| Missing values                      | 362/501    | 2.7 (2.1 – 3.5)    | <0.001  | 1.8 (1.3 - 2.5)             | <0.001  |
| <b>Follow up duration</b>           |            |                    |         |                             |         |
| 1-4                                 | 231/512    | 1                  | -       | 1                           | -       |
| 5-9                                 | 431/720    | 1.8 (1.4- 2.3)     | <0.001  | 1.2 (0.9 – 1.7)             | 0.156   |
| ≥10                                 | 526/759    | 2.7 (2.1 – 3.4)    | <0.001  | 1.4 (1.0 – 1.8)             | 0.043   |
| <b>Knowing HIV as a risk factor</b> |            |                    |         |                             |         |
| No                                  | 631/1172   | 1                  | -       | 1                           | -       |
| Yes                                 | 557/819    | 1.8 (1.5 – 2.2)    | <0.001  | 1.4 (1.1 – 1.8)             | 0.002   |

CC: cervical cancer

## DISCUSSION

This study assesses the cervical cancer screening coverage among 1,991 WLHIV in Abidjan, aged 42 years old in median, with low education level and socioeconomic situation, and a clinically and immunologically stable HIV disease. The great majority of women were aware that cervical cancer was accessible to screening, but information received was clear and understood by less than two fifth of them. Uptake of cervical cancer screening was around 60% and was associated with higher education level, clarity of information, onsite cervical cancer screening and identifying HIV as a risk factor for cervical cancer. In addition, lack of information and fear of being diagnosed with cervical cancer were the main reasons reported by WLHIV for not accessing to cervical cancer screening.

This study reports that three over five women living with HIV in our study population had been screened for cervical cancer at least once during the last three years. This result is higher than previous reports from Nigeria, Ethiopia and Uganda, where the cervical cancer screening uptake rates were 9.5%, 23.5% and 30.3%, respectively [17,18,23]. This result support the successful integration of cervical cancer screening services in HIV clinics in Cote d'Ivoire. Indeed, since 2010, the national cancer control program and the national aids control program have been involved in the pilot phase of the cervical cancer prevention project (CECAP) supported by ministry of health and implementing partners. The aim was to integrate cervical cancer screening in HIV clinics and improve access to screening for women living with HIV, highly susceptible to cervical cancer. From 2010 to 2015, almost all HIV clinics in Abidjan and the outlying area were equipped for cervical cancer screening and their staff trained to provide cervical cancer screening and treatment of eligible precancerous lesions free of charge [21]. The collaboration between AIDS and cancer control programs led to this successful integration of services that has been described in other SSA countries as a game changer for the prevention of cervical cancer among HIV-infected women [24–26]. The positive effect of this service integration is emphasized in our study by the association between screening uptake and the offer of cervical cancer screening “onsite”, in the HIV clinic were the participant is usually followed. This underlines the importance of scaling up the cervical cancer screening in all HIV clinics, as WLHIV will be more willing to accept the screening when proposed in the health facility they usually attend. Indeed, half of the screened women declared having accept the screening because it was advised by the healthcare worker at the HIV clinic [27].

Despite the important coverage of cervical cancer screening reported in this study, around 40% of WLHIV have never been screened despite their high risk of developing an invasive

1  
2  
3 cervical cancer, usually diagnosed at an advanced stage in SSA [28,29]. Lack of information  
4 was the main reason reported by WLHIV never screened for cervical cancer in Abidjan. This  
5 result suggests that despite efforts from the national cancer program to increase awareness  
6 of cervical cancer among women (either in hospital-based strategy by training healthcare  
7 workers to offer cervical cancer screening or in community-based strategy through mass media  
8 (TV, radio, internet) and awareness campaign involving community mobilizers), messages to  
9 raise awareness on cervical cancer and its prevention remain poorly disseminated.  
10

11  
12  
13  
14  
15 When analyzing factors associated to cervical cancer screening uptake, it appears that highly  
16 educated women and those who identified HIV as a risk factor for cervical cancer were more  
17 likely to be screened. Thus, misunderstanding of information on cervical cancer remains an  
18 important barrier to screening among WLHIV as reported in other studies [30–33]. In addition,  
19 the important gap (36%) observed between the numbers of women who had been offered  
20 cervical cancer screening and those who have been effectively screened, reported in our  
21 population is consistent with previous study from Uganda [17]. This result underlines the  
22 importance of a tailored communication strategy to take into account factors that influence the  
23 decision to undergo cervical cancer screening, such as low education level, the need for  
24 patient-centered communications and cultural beliefs reported in other SSA countries  
25 [30,32]. In addition to participant-related barriers, providers-related barriers such as lack of  
26 knowledge and failure to inform or encourage women to be screened were reported as  
27 important factors influencing cervical cancer screening uptake in other SSA countries [33]. In  
28 our study the role of health care providers appeared to be central in the decision of WLHIV to  
29 get screened as highlighted by the strong association between screening uptake and  
30 proposition of screening in the usual HIV clinic of the participants. This idea is supported by  
31 the association reported between screening uptake and receiving clear and understood  
32 information on cervical cancer screening from health care providers. Thus, the high rate of  
33 cervical cancer screening uptake reported in this study compared to other SSA countries could  
34 be explained by the influence of health care providers, mostly psychosocial agent who are in  
35 charge of linkage and retention of WLHIV and who are trained to inform WLHIV and refer them  
36 to screening unit. However qualitative studies are needed to deeply explore the provider's  
37 related barriers for screening uptake among the 40% of WLHIV who have never been screened  
38 in the participating HIV clinics.  
39  
40  
41  
42  
43  
44  
45  
46  
47  
48  
49  
50  
51  
52  
53  
54  
55

56 The WHO guideline for prevention and care of cervical cancer among women recommend for  
57 low- and middle-income countries to perform VIA screening for all WLHIV between 30-49 years  
58 old or older for those with visible transformation zone and to repeat the screening test within  
59  
60

1  
2  
3 three years if no lesions. In case of precancerous lesions eligible for treatment, they will have  
4 to attend the screening unit one year after treatment for a follow up visit with the aim of checking  
5 recurrence [34]. To improve the uptake of cervical cancer screening, it is critical to improve  
6 health education and awareness among WLHIV, by reshaping the hospital-based  
7 communication approach for cervical cancer screening. A recent systematic review on  
8 strategies implemented in SSA to improve cervical cancer screening reported that about three  
9 quarter of these strategies include education and awareness activities, but most of them failed  
10 to demonstrate the effectiveness of the strategy [35]. Most of these interventions had  
11 anticipated solution for financial barriers for clients, materials supply and capacity building of  
12 staff, while the main problem is to improve beneficiaries understanding of cervical cancer  
13 prevention messages. Usually, the level of communication on cervical cancer prevention  
14 services is standardized and not adapted to all the social categories. A specific educational  
15 program, which uses culturally sensitive and linguistically appropriate strategies to deliver,  
16 tailored cervical cancer prevention messages could enhance awareness of WLHIV and  
17 increase access to cervical cancer screening. Furthermore, a collaboration between cervical  
18 cancer screening providers and community health educators is critical to improve the  
19 understanding of health education messages as already reported in SSA [36].  
20  
21  
22  
23  
24  
25  
26  
27  
28  
29

30 This study was conducted among WLHIV followed in HIV clinics located in the urban area of  
31 Abidjan. These results may thus mostly reflect the feature in urban settings where people are  
32 more educated and more exposed to cervical cancer awareness activities than in rural settings.  
33 In addition, this study was conducted in the largest and oldest HIV clinics in Abidjan, where  
34 cervical cancer screening is provided free of charge since the initiation of CECAP in 2010  
35 potentially overestimating the overall cervical cancer screening uptake in Abidjan. The cross-  
36 sectional design of the study did not allow us to draw any causal relationship between the  
37 uptake of cervical cancer screening and the reported associated factors. Given the relatively  
38 high prevalence of cervical cancer screening uptake, measures of association reported  
39 between this outcome and its correlates through Odd ratio have likely overestimated relative  
40 risks usually reported through prevalence ratio. While alternative modeling approaches such  
41 as a Log binomial regression would have been more appropriate to provide risk estimates.  
42 However, as our main objective was to identify association between our covariates and the  
43 measure of cervical cancer screening uptake, a logistic regression model remains an adapted  
44 approach in this particular situation [37]. Although the questionnaire was administered during  
45 face-to-face interviews by previously trained monitors, we cannot exclude bias related to the  
46 declarative nature of the collected information, such as memory bias or social desirability bias.  
47 However, the survey was conducted in the four largest HIV clinics in the country, using a daily-  
48 repeated systematic random selection procedure over a four-month period. This enabled to  
49  
50  
51  
52  
53  
54  
55  
56  
57  
58  
59  
60

1  
2  
3 take into account the heterogeneity of the population attending these HIV clinics and helped  
4 mitigate the risk of selection bias.  
5  
6  
7  
8  
9  
10  
11  
12  
13  
14  
15  
16  
17  
18  
19  
20  
21  
22  
23  
24  
25  
26  
27  
28  
29  
30  
31  
32  
33  
34  
35  
36  
37  
38  
39  
40  
41  
42  
43  
44  
45  
46  
47  
48  
49  
50  
51  
52  
53  
54  
55  
56  
57  
58  
59  
60

For peer review only

## CONCLUSION

Initiatives to support cervical cancer screening in HIV care programs have resulted in effective access to more than half of the WLHIV followed in the three major HIV clinics in Abidjan. Nevertheless, efforts are still needed to provide universal access to cervical cancer screening, which remains an AIDS-defining cancer poorly prevented by antiretroviral treatments compared to Kaposi Sarcoma or Non-Hodgkin Lymphomas. Promoting cervical cancer screening among socio-economically disadvantaged WLHIV by addressing client barriers still need to be prioritized.

### Figure legend caption

**Figure 1:** Reasons for not being screened for cervical cancer among women living with HIV in Côte d'Ivoire, West Africa

### ACKNOWLEDGEMENTS

We would like to warmly thank Pr François Dabis for his advises and orientation when designing and implementing the study, as well as Mr Azany Jean Claude for his strong support in data management and study monitoring.

### Funding:

The study was conducted under the leDEA West Africa collaboration grants funded by the National Cancer Institute (NCI); Eunice Kennedy Shriver National Institute of Child Health & Human Development (NICHD); National Institute of Allergy and Infectious Diseases (NIAID); Grant number: 5U01AI069919.

### Competing interest

None declared.

### Authors Contribution

BT and AJ designed the study. BT, SB, JJK, DKE, AH, AT, EM, SOK, IA and AJ supervised the study implementation and data collection. Statistical analysis was performed by BT, SB and AJ. Data interpretation and first draft of manuscript was done by BT, SB, JJK and AJ. Critical revision of the manuscript for important intellectual content was provided by all the coauthors who read and commented on the original manuscript and all agreed on the version finalized by BT, SB and AJ for submission.

### Data availability statement

All files used in the present analysis will be made available after acceptance of the manuscript at the following URL <https://figshare.com/s/aa30384566ff726358ba>. Authors may be contacted at [boris.tchounga@yahoo.fr](mailto:boris.tchounga@yahoo.fr) and [antoine.jaquet@u-bordeaux.fr](mailto:antoine.jaquet@u-bordeaux.fr).

## REFERENCES

1. Bray F, Ferlay J, Soerjomataram I, Siegel RL, Torre LA, Jemal A. Global cancer statistics 2018: GLOBOCAN estimates of incidence and mortality worldwide for 36 cancers in 185 countries. *CA Cancer J Clin*. 1 nov 2018;68(6):394-424.
2. International Agency for Research on Cancer. Estimated number of incidence and deaths in 2018, WHO Africa region (AFRO), females, all ages [Internet]. IARC, WHO Cancer Today. 2018 [cité 14 janv 2019]. Disponible sur: <http://gco.iarc.fr/today/home>
3. Xi LF, Demers GW, Koutsky LA, Kiviat NB, Kuypers J, Watts DH, et al. Analysis of Human Papillomavirus Type 16 Variants Indicates Establishment of Persistent Infection. *J Infect Dis*. 1 sept 1995;172(3):747-55.
4. Clifford G, Franceschi S, Diaz M, Muñoz N, Villa LL. Chapter 3: HPV type-distribution in women with and without cervical neoplastic diseases. *Vaccine*. 21 août 2006;24:S26-34.
5. Bonnet F, Lewden C, May T, Heripret L, Jouglu E, Bevilacqua S, et al. Malignancy-related causes of death in human immunodeficiency virus-infected patients in the era of highly active antiretroviral therapy. *Cancer*. 15 juill 2004;101(2):317-24.
6. Massad LS, Ahdieh L, Benning L, Minkoff H, Greenblatt RM, Watts H, et al. Evolution of cervical abnormalities among women with HIV-1: evidence from surveillance cytology in the women's interagency HIV study. *J Acquir Immune Defic Syndr* 1999. 15 août 2001;27(5):432-42.
7. Horo A, Jaquet A, Ekouevi DK, Toure B, Coffie PA, Effi B, et al. Cervical cancer screening by visual inspection in Côte d'Ivoire, operational and clinical aspects according to HIV status. *BMC Public Health*. 23 mars 2012;12:237.
8. Cervical cancer and HIV—two diseases, one response [Internet]. [cité 30 mai 2019]. Disponible sur: <https://www.unaids.org/en/resources/presscentre/featurestories/2018/october/cervical-cancer-and-hiv>
9. Dryden-Peterson S, Bvochora-Nsingo M, Suneja G, Efstathiou JA, Grover S, Chiyapo S, et al. HIV Infection and Survival Among Women With Cervical Cancer. *J Clin Oncol Off J Am Soc Clin Oncol*. 1 nov 2016;34(31):3749-57.
10. World Health Organization. WHO Comprehensive cervical cancer control: a guide to essential practice – 2nd ed. [Internet]. Geneva, Switzerland: WHO; 2014 [cité 15 sept 2017] p. 408. Disponible sur: <http://www.who.int/reproductivehealth/publications/cancers/cervical-cancer-guide/en/>
11. Belhadj H, Rasanathan JJK, Denny L, Broutet N. Sexual and reproductive health and HIV services: integrating HIV/AIDS and cervical cancer prevention and control. *Int J Gynaecol Obstet Off Organ Int Fed Gynaecol Obstet*. mai 2013;121 Suppl 1:S29-34.
12. Tchounga BK, Jaquet A, Coffie PA, Horo A, Sauvaget C, Adoubi I, et al. Cervical cancer prevention in reproductive health services: knowledge, attitudes and practices of midwives in Côte d'Ivoire, West Africa. *BMC Health Serv Res*. 11 avr 2014;14:165.



13. White HL, Meglioli A, Chowdhury R, Nuccio O. Integrating cervical cancer screening and preventive treatment with family planning and HIV-related services. *Int J Gynaecol Obstet Off Organ Int Fed Gynaecol Obstet.* juill 2017;138 Suppl 1:41-6.
14. Barbosa IR. Regional and Socioeconomic Differences in the Coverage of the Papanicolaou Test in Brazil: Data from the Brazilian Health Survey 2013. *Rev Bras Ginecol E Obstet Rev Fed Bras Soc Ginecol E Obstet.* sept 2017;39(9):480-7.
15. Swan J, Breen N, Coates RJ, Rimer BK, Lee NC. Progress in cancer screening practices in the United States: results from the 2000 National Health Interview Survey. *Cancer.* 15 mars 2003;97(6):1528-40.
16. Oussaid N, Lutringer-Magnin D, Barone G, Haesebaert J, Lasset C. Factors associated with Pap smear screening among French women visiting a general practitioner in the Rhône-Alpes region. *Rev Epidemiol Sante Publique.* oct 2013;61(5):437-45.
17. Wanyenze RK, Bwanika JB, Beyeza-Kashesya J, Mugerwa S, Arinaitwe J, Matovu JKB, et al. Uptake and correlates of cervical cancer screening among HIV-infected women attending HIV care in Uganda. *Glob Health Action.* 2017;10(1):1380361.
18. Erku DA, Netere AK, Mersha AG, Abebe SA, Mekuria AB, Belachew SA. Comprehensive knowledge and uptake of cervical cancer screening is low among women living with HIV/AIDS in Northwest Ethiopia. *Gynecol Oncol Res Pract.* 2017;4:20.
19. Ebu NI. Socio-demographic characteristics influencing cervical cancer screening intention of HIV-positive women in the central region of Ghana. *Gynecol Oncol Res Pract.* 2018;5:3.
20. Évaluation de l'impact du VIH dans la population générale en CÔTE D'IVOIRE, CIPHIA 2017-2018 [Internet]. [cité 4 févr 2019]. Disponible sur: [https://phia.icap.columbia.edu/wp-content/uploads/2018/09/3474CIPHIA\\_Cote-D27Ivoire-SS\\_FRENCH.v6.FINAL\\_.pdf](https://phia.icap.columbia.edu/wp-content/uploads/2018/09/3474CIPHIA_Cote-D27Ivoire-SS_FRENCH.v6.FINAL_.pdf)
21. National Cancer Control Program. National guidelines for the cervical cancer prevention, Cote d'Ivoire. National Cancer Control Program (NCCP), Cote d'Ivoire; 2013.
22. UNAIDS. Country factsheets Côte d'Ivoire 2017 [Internet]. [cité 31 mai 2019]. Disponible sur: <https://www.unaids.org/en/regionscountries/countries/ctedivoire>
23. Ezechi OC, Gab-Okafor CV, Ostergren PO, Odberg Pettersson K. Willingness and acceptability of cervical cancer screening among HIV positive Nigerian women. *BMC Public Health.* 17 janv 2013;13:46.
24. Franceschi S, Jaffe H. Cervical cancer screening of women living with HIV infection: a must in the era of antiretroviral therapy. *Clin Infect Dis Off Publ Infect Dis Soc Am.* 15 août 2007;45(4):510-3.
25. Odafe S, Torpey K, Khamofu H, Oladele E, Adedokun O, Chabikuli O, et al. Integrating cervical cancer screening with HIV care in a district hospital in Abuja, Nigeria. *Niger Med J J Niger Med Assoc.* 2013;54(3):176-84.

- 1
- 2
- 3 26. Renewed Partnership to Help End AIDS and Cervical Cancer in Africa [Internet]. [cité
- 4 31 mai 2019]. Disponible sur: <https://www.pepfar.gov/press/releases/281984.htm>
- 5
- 6
- 7 27. Implementation Science Graphic Brief In Review: Health Benefits of Linking women to
- 8 Cervical Cancer Screening in Zambia [Internet]. 2016 [cité 31 mai 2019]. Disponible
- 9 sur: [https://www.usaid.gov/what-we-do/global-health/hiv-and-aids/information-](https://www.usaid.gov/what-we-do/global-health/hiv-and-aids/information-center/hiv-and-aids-research-corner/cervical-cancer-screening-zambia)
- 10 [center/hiv-and-aids-research-corner/cervical-cancer-screening-zambia](https://www.usaid.gov/what-we-do/global-health/hiv-and-aids/information-center/hiv-and-aids-research-corner/cervical-cancer-screening-zambia)
- 11
- 12 28. Dunyo P, Effah K, Udofia EA. Factors associated with late presentation of cervical
- 13 cancer cases at a district hospital: a retrospective study. *BMC Public Health*. 3 oct
- 14 2018;18(1):1156.
- 15
- 16 29. Menon MP, Coghill A, Mutyaba IO, Phipps WT, Okuku FM, Harlan JM, et al.
- 17 Association Between HIV Infection and Cancer Stage at Presentation at the Uganda
- 18 Cancer Institute. *J Glob Oncol*. sept 2018;(4):1-9.
- 19
- 20 30. Bukirwa A, Mutyoba JN, Mukasa BN, Karamagi Y, Odiit M, Kawuma E, et al.
- 21 Motivations and barriers to cervical cancer screening among HIV infected women in
- 22 HIV care: a qualitative study. *BMC Womens Health*. 12 oct 2015;15:82.
- 23
- 24 31. Williams M, Kuffour G, Ekuadzi E, Yeboah M, ElDuah M, Tuffour P. Assessment of
- 25 psychological barriers to cervical cancer screening among women in Kumasi, Ghana
- 26 using a mixed methods approach. *Afr Health Sci*. déc 2013;13(4):1054-61.
- 27
- 28 32. Lim JNW, Ojo AA. Barriers to utilisation of cervical cancer screening in Sub Sahara
- 29 Africa: a systematic review. *Eur J Cancer Care (Engl)*. janv 2017;26(1).
- 30
- 31 33. McFarland DM, Gueldner SM, Mogobe KD. Integrated Review of Barriers to Cervical
- 32 Cancer Screening in Sub-Saharan Africa. *J Nurs Scholarsh Off Publ Sigma Theta Tau*
- 33 *Int Honor Soc Nurs*. 2016;48(5):490-8.
- 34
- 35 34. World Health Organization, éditeur. WHO guidelines for screening and treatment of
- 36 precancerous lesions for cervical cancer prevention. Geneva: World Health
- 37 Organization; 2013. 40 p.
- 38
- 39 35. Johnson LG, Armstrong A, Joyce CM, Teitelman AM, Buttenheim AM. Implementation
- 40 strategies to improve cervical cancer prevention in sub-Saharan Africa: a systematic
- 41 review. *Implement Sci IS*. 09 2018;13(1):28.
- 42
- 43 36. Uy C, Lopez J, Trinh-Shevrin C, Kwon SC, Sherman SE, Liang PS. Text Messaging
- 44 Interventions on Cancer Screening Rates: A Systematic Review. *J Med Internet Res*. 24
- 45 août 2017;19(8):e296.
- 46
- 47 37. Cook TD. Advanced Statistics: Up with Odds Ratios! A Case for Odds Ratios When
- 48 Outcomes Are Common. *Acad Emerg Med*. 2002;9(12):1430-4.
- 49
- 50
- 51
- 52
- 53
- 54
- 55
- 56
- 57
- 58
- 59
- 60

1  
2  
3  
4  
5  
6  
7  
8  
9  
10  
11  
12  
13  
14  
15  
16  
17  
18  
19  
20  
21  
22  
23  
24  
25  
26  
27  
28  
29  
30  
31  
32  
33  
34  
35  
36  
37  
38  
39  
40  
41  
42  
43  
44  
45  
46  
47  
48  
49  
50  
51  
52  
53  
54  
55  
56  
57  
58  
59  
60

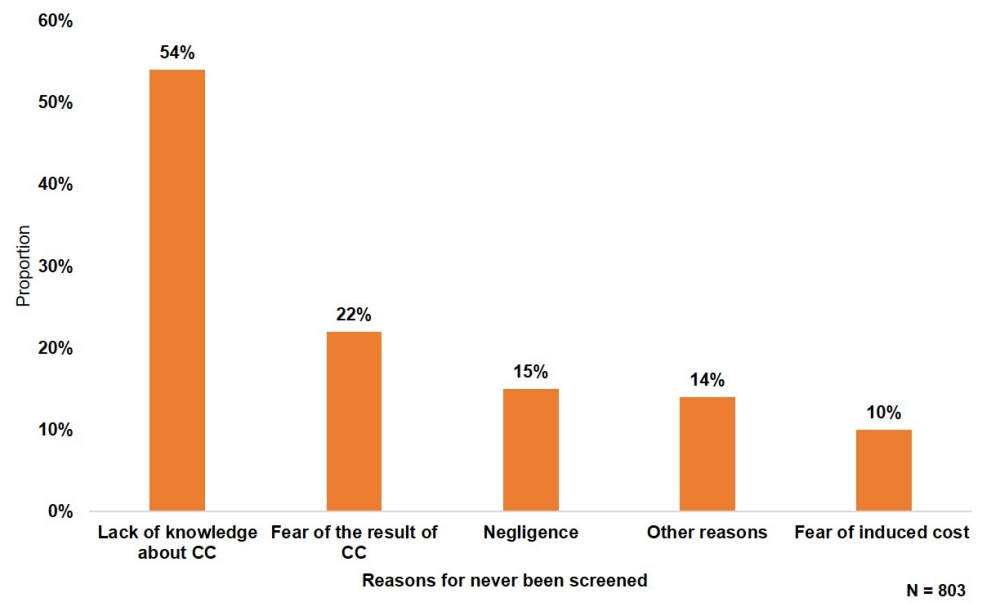

Figure 1: Reasons for not being screened for cervical cancer among women living with HIV in Côte d'Ivoire, West Africa

207x126mm (150 x 150 DPI)

STROBE Statement—Checklist of items that should be included in reports of *cross-sectional studies*

|                              | Item No | Recommendation                                                                                                                                                                                               | Page No |
|------------------------------|---------|--------------------------------------------------------------------------------------------------------------------------------------------------------------------------------------------------------------|---------|
| <b>Title and abstract</b>    | 1       | (a) Indicate the study's design with a commonly used term in the title or the abstract                                                                                                                       | 1       |
|                              |         | (b) Provide in the abstract an informative and balanced summary of what was done and what was found                                                                                                          | 2       |
| <b>Introduction</b>          |         |                                                                                                                                                                                                              |         |
| Background/rationale         | 2       | Explain the scientific background and rationale for the investigation being reported                                                                                                                         | 3       |
| Objectives                   | 3       | State specific objectives, including any prespecified hypotheses                                                                                                                                             | 3       |
| <b>Methods</b>               |         |                                                                                                                                                                                                              |         |
| Study design                 | 4       | Present key elements of study design early in the paper                                                                                                                                                      | 4       |
| Setting                      | 5       | Describe the setting, locations, and relevant dates, including periods of recruitment, exposure, follow-up, and data collection                                                                              | 4       |
| Participants                 | 6       | (a) Give the eligibility criteria, and the sources and methods of selection of participants                                                                                                                  | 4       |
| Variables                    | 7       | Clearly define all outcomes, exposures, predictors, potential confounders, and effect modifiers. Give diagnostic criteria, if applicable                                                                     | 4       |
| Data sources/<br>measurement | 8*      | For each variable of interest, give sources of data and details of methods of assessment (measurement). Describe comparability of assessment methods if there is more than one group                         | 4       |
| Bias                         | 9       | Describe any efforts to address potential sources of bias                                                                                                                                                    | 4       |
| Study size                   | 10      | Explain how the study size was arrived at                                                                                                                                                                    | 4       |
| Quantitative variables       | 11      | Explain how quantitative variables were handled in the analyses. If applicable, describe which groupings were chosen and why                                                                                 | 4       |
| Statistical methods          | 12      | (a) Describe all statistical methods, including those used to control for confounding                                                                                                                        | 4       |
|                              |         | (b) Describe any methods used to examine subgroups and interactions                                                                                                                                          | 4       |
|                              |         | (c) Explain how missing data were addressed                                                                                                                                                                  | 4       |
|                              |         | (d) If applicable, describe analytical methods taking account of sampling strategy                                                                                                                           |         |
|                              |         | (e) Describe any sensitivity analyses                                                                                                                                                                        |         |
| <b>Results</b>               |         |                                                                                                                                                                                                              |         |
| Participants                 | 13*     | (a) Report numbers of individuals at each stage of study—eg numbers potentially eligible, examined for eligibility, confirmed eligible, included in the study, completing follow-up, and analysed            | 6       |
|                              |         | (b) Give reasons for non-participation at each stage                                                                                                                                                         |         |
|                              |         | (c) Consider use of a flow diagram                                                                                                                                                                           |         |
| Descriptive data             | 14*     | (a) Give characteristics of study participants (eg demographic, clinical, social) and information on exposures and potential confounders                                                                     | 6       |
|                              |         | (b) Indicate number of participants with missing data for each variable of interest                                                                                                                          |         |
| Outcome data                 | 15*     | Report numbers of outcome events or summary measures                                                                                                                                                         | 6       |
| Main results                 | 16      | (a) Give unadjusted estimates and, if applicable, confounder-adjusted estimates and their precision (eg, 95% confidence interval). Make clear which confounders were adjusted for and why they were included | 6       |

|                          |    |                                                                                                                                                                            |    |
|--------------------------|----|----------------------------------------------------------------------------------------------------------------------------------------------------------------------------|----|
|                          |    | (b) Report category boundaries when continuous variables were categorized                                                                                                  | 6  |
|                          |    | (c) If relevant, consider translating estimates of relative risk into absolute risk for a meaningful time period                                                           | 6  |
| Other analyses           | 17 | Report other analyses done—eg analyses of subgroups and interactions, and sensitivity analyses                                                                             | 7  |
| <b>Discussion</b>        |    |                                                                                                                                                                            |    |
| Key results              | 18 | Summarise key results with reference to study objectives                                                                                                                   | 8  |
| Limitations              | 19 | Discuss limitations of the study, taking into account sources of potential bias or imprecision. Discuss both direction and magnitude of any potential bias                 | 9  |
| Interpretation           | 20 | Give a cautious overall interpretation of results considering objectives, limitations, multiplicity of analyses, results from similar studies, and other relevant evidence | 8  |
| Generalisability         | 21 | Discuss the generalisability (external validity) of the study results                                                                                                      | 10 |
| <b>Other information</b> |    |                                                                                                                                                                            |    |
| Funding                  | 22 | Give the source of funding and the role of the funders for the present study and, if applicable, for the original study on which the present article is based              | 11 |

\*Give information separately for exposed and unexposed groups.

**Note:** An Explanation and Elaboration article discusses each checklist item and gives methodological background and published examples of transparent reporting. The STROBE checklist is best used in conjunction with this article (freely available on the Web sites of PLoS Medicine at <http://www.plosmedicine.org/>, Annals of Internal Medicine at <http://www.annals.org/>, and Epidemiology at <http://www.epidem.com/>). Information on the STROBE Initiative is available at [www.strobe-statement.org](http://www.strobe-statement.org).
